# Supplementary material for: Metabolomic analysis of exosomal-markers in esophageal squamous cell carcinoma
Source: Royal Society of Chemistry journal article supplement (doi:10.1039/d1nr04015d), 2021-01-01
Supplement: d1nr04015d1.pdf [file d1nr04015d1.pdf]

Supplementary Materials

## **Metabolomic analysis of exosomal-markers in esophageal squamous cell carcinoma**

Qingfu Zhu,<sup>a</sup> Liu Huang,<sup>b</sup> Qinsi Yang,<sup>c</sup> Zheng Ao,<sup>d</sup> Rui Yang,<sup>a</sup> Jonathan Krzesniak,<sup>d</sup> Doudou Lou,<sup>a</sup> Liang Hu,<sup>a</sup> Xiaodan Dai,<sup>a</sup> Feng Guo,<sup>\*d</sup> and Fei Liu,<sup>\*a,c</sup>

- a. Eye Hospital, School of Ophthalmology and Optometry, School of Biomedical Engineering, Wenzhou Medical University, Wenzhou, Zhejiang, China.
- b. Department of Laboratory Medicine, Tongji Hospital, Tongji Medical College, Huazhong University of Science and Technology, Wuhan, China
- c. Wenzhou Institute, University of Chinese Academy of Sciences, Wenzhou, Zhejiang, China
- d. Department of Intelligent Systems Engineering, Indiana University, Bloomington, IN 47405, USA.

\*Corresponding authors : Feng Guo: [fengguo@iu.edu](mailto:fengguo@iu.edu) ; Fei Liu: [feiliu@wmu.edu.cn](mailto:feiliu@wmu.edu.cn)

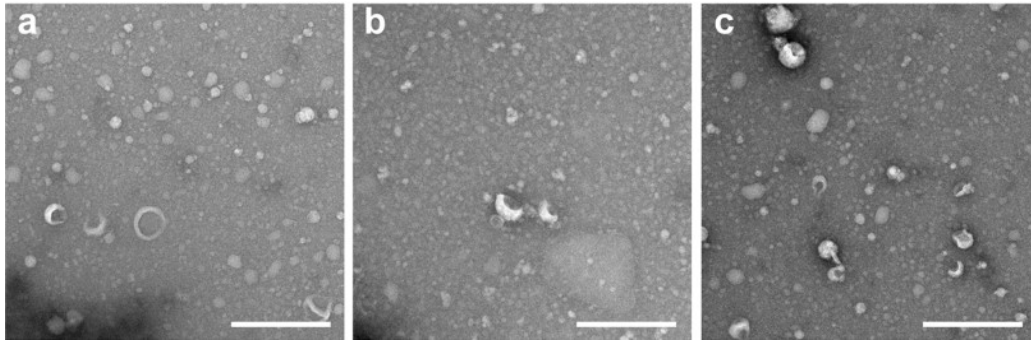

**Supplementary Fig. 1:** Typical exosome morphologies using TEM analysis from groups of (a) recrudescence patient and (b) non-recrudescence patient and (c) healthy donor. Scale bar is 500 nm.

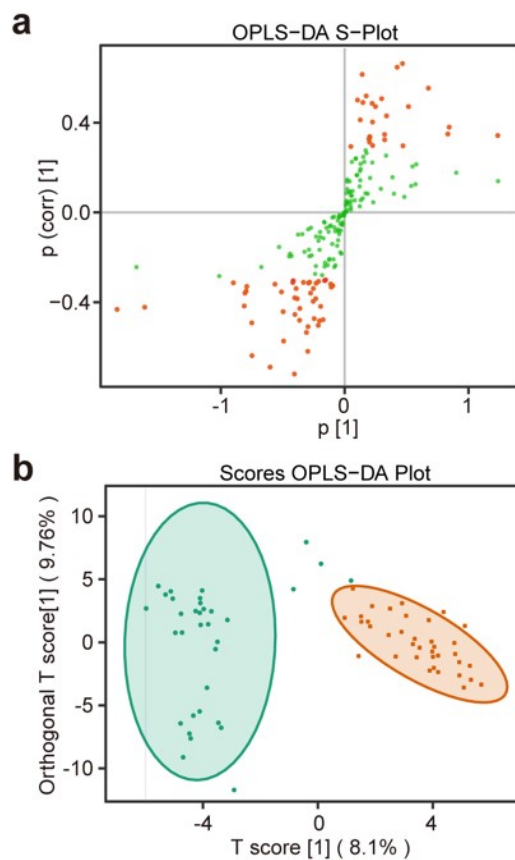

**Supplementary Figure 2:** OPLS-DA analysis of the groups of recrudescence patients and non-recrudescence patients. (a) OPLS-DA S plot of two groups. The VIP values of green points are below 1, and VIP of red points are above 1. (b) The score of OPLS-DA plot. The parameters are:  $R^2X(\text{cum})$ , 0.179;  $R^2Y(\text{cum})$ , 0.866;  $Q^2(\text{cum})$ , 0.716; pre, 1; ort, 1.

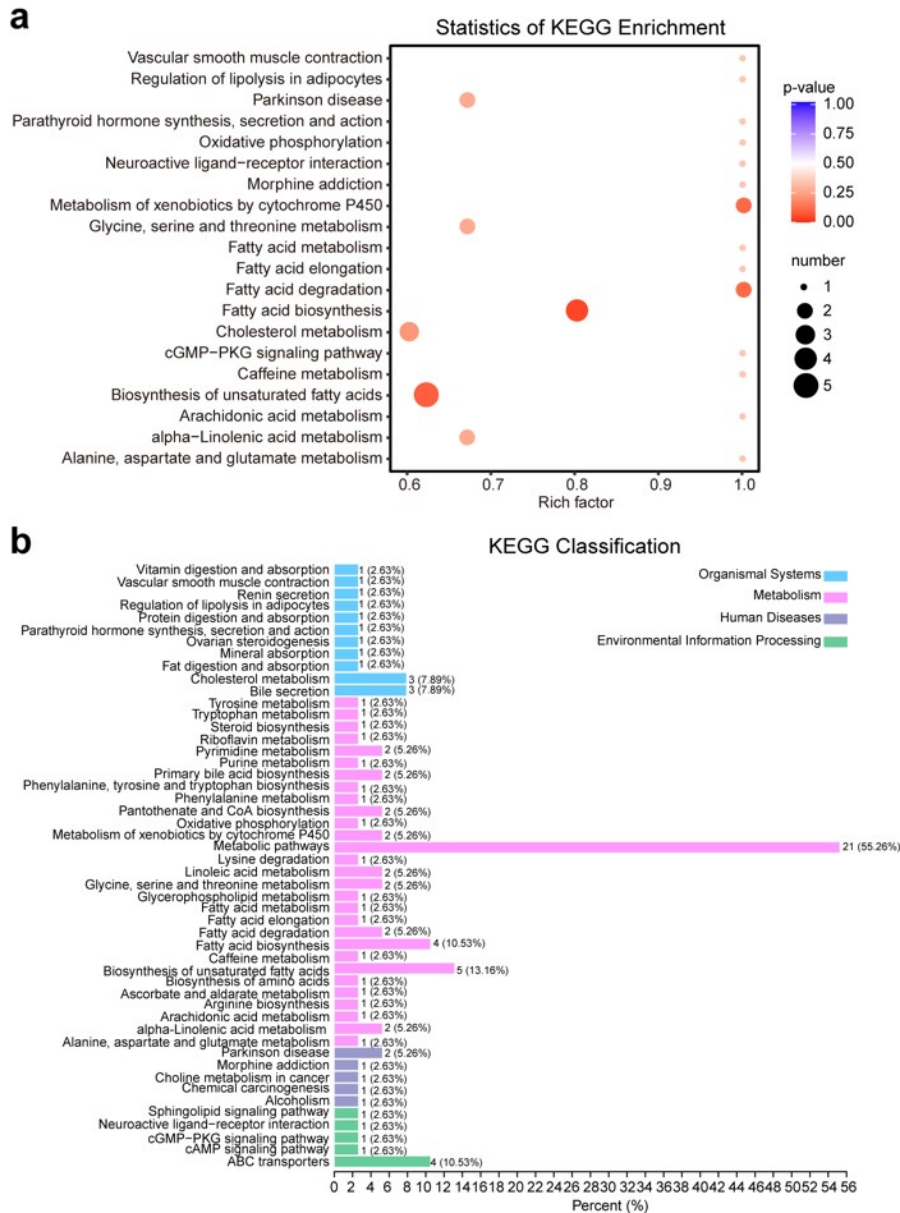

**Supplementary Figure 3:** Enrichment analysis of the differential metabolites between the groups of recrudescence patients and non-recrudescence patients. (a) Statistics of KEGG pathways based on differential metabolites. (b) Percentages of pathway classifications based on KEGG annotations.

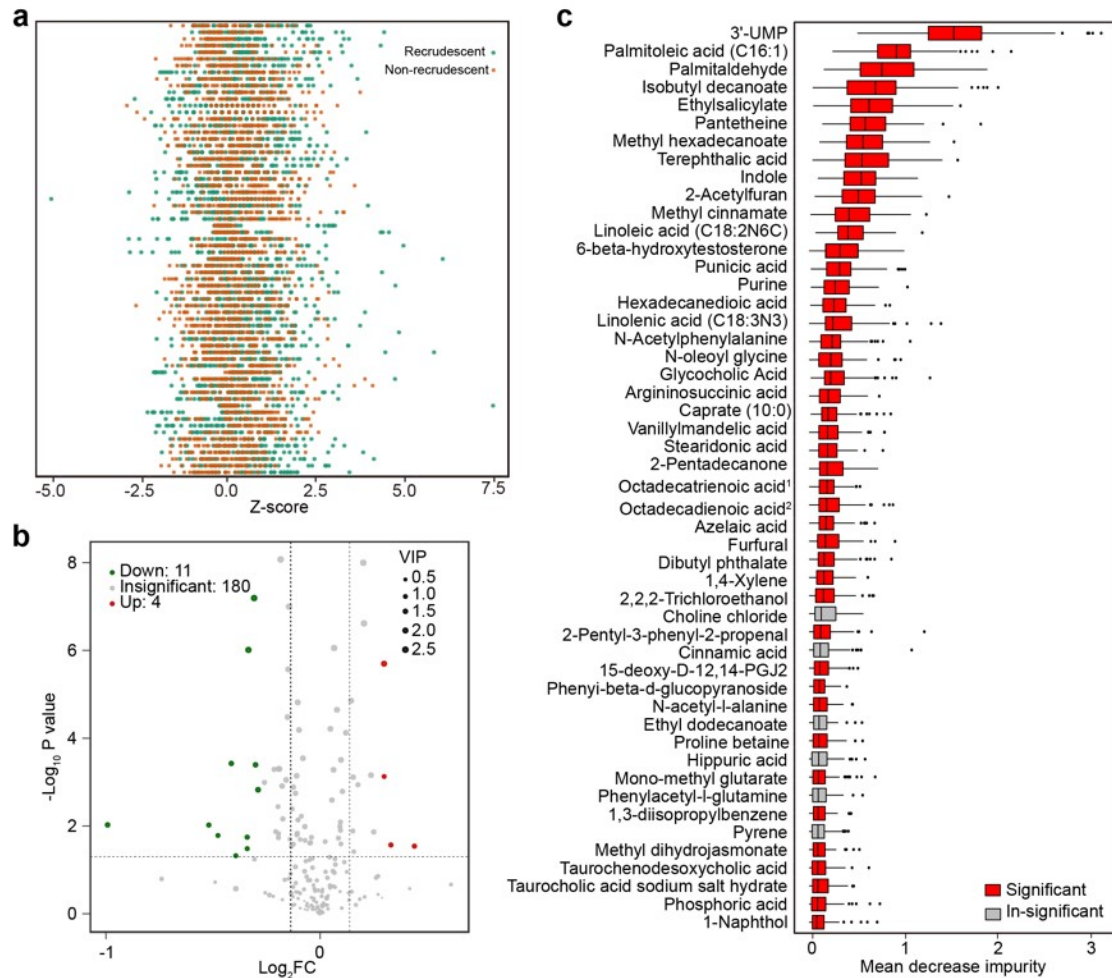

**Supplementary Figure 4:** Selection of significant metabolites for classifying recrudescent and non-recrudescent patients. (1) Calculation of the Z scores to show the normalized abundance of the differential metabolites between two groups. (2) Volcano plot showing the significant metabolites considering VIP value, p-value, and FC value. (3) Random forest modeling of the importance of marker candidates according to their mean decrease impurity (octadecatrienoic acid<sup>1</sup>, 13-HOTrE [13S-hydroxy-9Z,11E,15Z-octadecatrienoic acid]; octadecatrienoic acid<sup>2</sup>, 9-oxoODE [9-oxo-10E,12Z-octadecadienoic acid]).

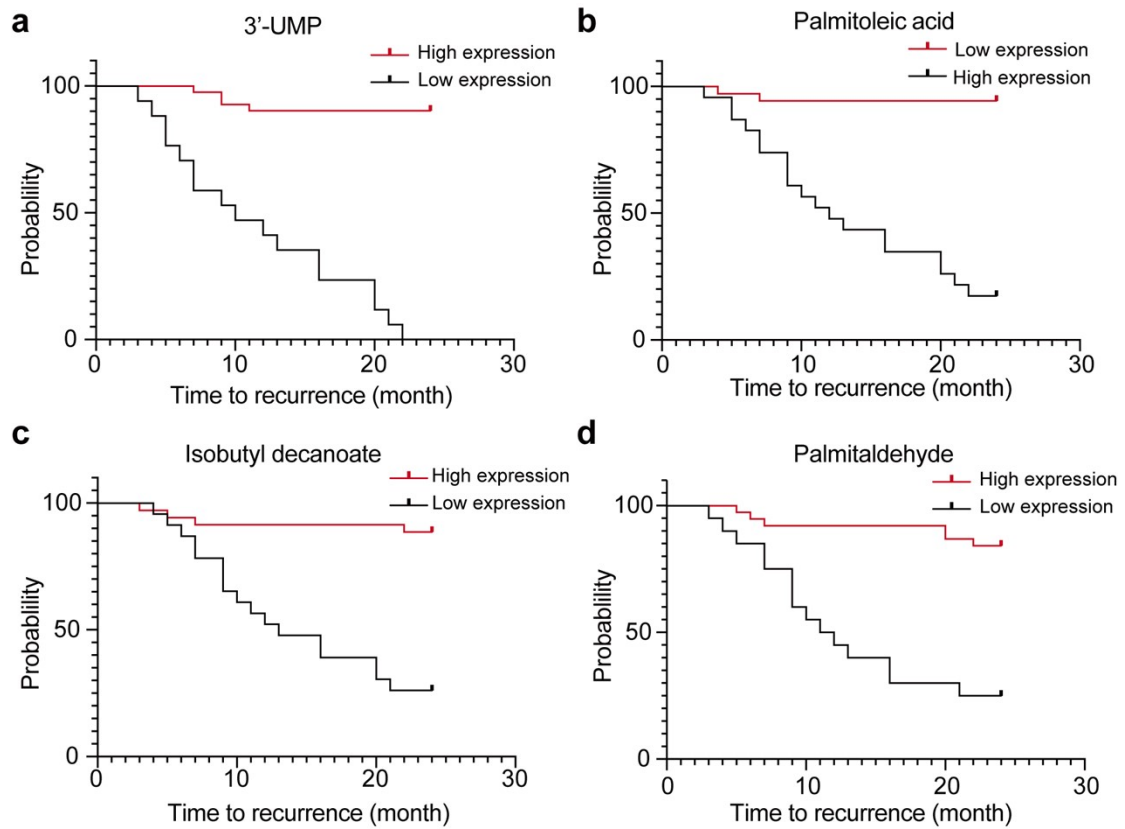

**Supplementary Figure 5:** Evaluation of the selected metabolic markers from random forest by the Kaplan-Meier analysis. From a-b are: 3'-UMP, palmitoleic acid, isobutyl decanoate and palmitaldehyde.

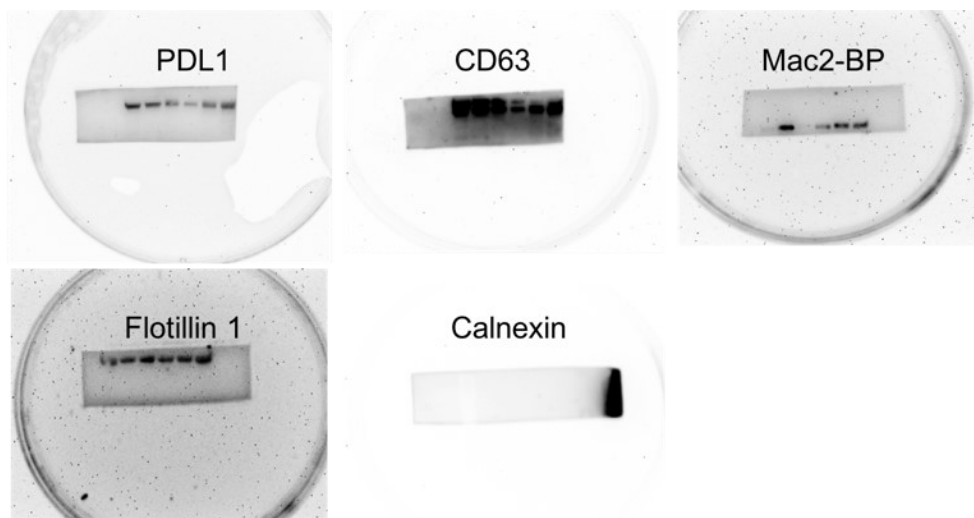

Supplementary Figure 6: Original WB scans for Figure 2.c
