# Supplementary material for: Metabolomic analysis of exosomal-markers in esophageal squamous cell carcinoma
Source: Royal Society of Chemistry journal article supplement (doi:10.1039/d1nr04015d), 2021-01-01
Supplement: d1nr04015d3.xlsx [file d1nr04015d3.xlsx]

## Sheet: S-Table 2
Supplementary Table 2: Identified exosomal metabolites from all groups
Compounds	Class	Healthy Control (relative intensity)																				Recrudescent group (relative intensity)
		A1	A2	A3	A4	A5	A6	A7	A8	A9	A10	A11	A12	A13	A14	A15	A16	A17	A18	A19	A20	B1	B2	B3	B4	B5	B6	B7	B8	B9	B10	B11	B12	B13	B14	B15	B16	B17	B18	B19	B20	B21	B22	B23	B24	B25	B26	B27	B28
Allantoin	Organic Acid And Its Derivatives	3760000	4990000	4790000	4500000	4300000	4280000	5460000	3960000	4650000	4000000	4810000	5080000	4370000	4140000	4460000	4630000	4150000	4470000	4900000	4650000	3910000	3850000	5450000	4920000	6130000	4500000	4360000	4650000	4430000	4930000	4930000	3920000	4940000	4530000	5080000	5050000	4600000	4820000	4850000	4120000	4310000	4560000	4870000	4850000	4020000	4560000	4310000	4680000
L-Cysteine	Amino Acid metabolomics	864000	795000	840000	882000	842000	791000	911000	863000	773000	777000	964000	860000	859000	867000	821000	856000	986000	873000	862000	902000	818000	779000	900000	841000	990000	777000	847000	891000	794000	865000	870000	839000	893000	885000	839000	896000	846000	954000	863000	796000	821000	847000	895000	885000	790000	884000	993000	858000
Benzoic Acid	Benzene and substituted derivatives	535000	758000	413000	439000	444000	408000	406000	390000	439000	453000	508000	485000	418000	435000	483000	465000	408000	451000	432000	447000	555000	419000	486000	438000	446000	470000	434000	493000	452000	516000	423000	533000	580000	466000	472000	529000	718000	521000	488000	541000	445000	443000	514000	487000	463000	527000	535000	511000
Terephthalic Acid	Benzene and substituted derivatives	1080000	1090000	1060000	1010000	855000	1000000	1160000	1150000	997000	1070000	1340000	1190000	1190000	1190000	932000	1190000	1030000	1200000	1150000	1070000	1160000	1100000	1090000	1100000	1220000	1210000	1130000	1190000	1230000	1240000	1140000	1260000	1080000	1180000	1090000	1040000	1180000	1010000	1150000	1070000	1190000	1120000	1240000	1230000	1220000	1250000	1420000	1260000
Taurochenodesoxycholic Acid	Bile Acids	35100	36200	39600	35300	38300	39100	28600	30500	39600	26800	32100	36700	29700	35300	31500	34200	34400	37000	37200	39700	33400	33000	38200	32200	34100	35000	38000	37000	35700	38500	35400	40800	37200	40800	36100	38100	34600	30800	39000	41700	42800	40800	39600	39100	47000	47400	40200	45100
Glycocholic Acid	Bile Acids	26800	26800	35200	21600	23800	30400	21300	25600	31300	27800	35300	35200	37100	31300	30400	37000	27200	39200	42900	25600	26300	32100	33500	26800	25100	35600	29700	31900	32200	48200	33200	28000	31000	31900	38300	34700	26000	38800	30700	23800	30900	33700	34600	32700	37500	33400	38800	40200
Glycochenodeoxycholic Acid	Bile Acids	22400	14000	23000	2640	18600	16200	33100	10700	16900	26900	50300	24400	7800	35100	27200	41900	63000	39000	535000	25900	4320	1030	1480	6050	8460	3790	5320	22400	10900	1980	2920	38100	3460	2830	13400	11600	5470	17000	11300	5190	888	1690	5320	5480	1370	4720	1540	666
Vanillin	Phenols And Its Derivatives	2910	6220	5630	2620	4420	3600	4810	1580	2740	6800	3590	6450	2550	4420	1090	5870	1860	12700	3630	2400	4120	5520	4670	6730	4560	10000	2910	3120	1870	3650	3510	6250	6630	4810	4900	4940	18400	4970	1100	3600	7680	2080	5010	6790	3450	8460	4730	2340
Cytidine-5-Monophosphate	Nucleotide metabolomics	12300	14900	6110	13900	14500	15300	10400	14800	12800	13200	15400	16200	10100	12400	10500	17500	16000	17600	13000	12200	15000	14200	20500	24900	8150	15700	8710	9640	19200	19400	11200	13600	15000	11100	13400	13600	14900	13400	10000	21800	12400	17500	16800	18400	10700	21700	14400	21200
Uracil	Nucleotide metabolomics	21400	21400	19700	16600	29200	29500	22300	23400	18600	20000	17900	23400	32300	24500	37900	21300	20600	17300	24300	23200	15300	23800	19200	21600	26000	21900	28900	24300	28900	17300	31400	28000	25800	18700	26800	18400	24500	22400	27800	29800	25700	31000	22300	35200	25500	35600	30600	25000
Β-Nicotinamide Mononucleotide	Nucleotide metabolomics	7280	10200	7770	5470	11800	12500	3450	7140	10500	11200	11200	10000	6980	7510	5010	11400	10900	11400	7990	8370	5900	10800	5970	14200	14200	9660	10200	5480	12900	11200	10800	5260	20600	11600	8980	7090	13700	3310	7200	20300	10800	6810	8620	11800	18000	13400	8030	12300
D-Trehalose	Carbohydrate metabolomics	496000	443000	482000	491000	415000	525000	398000	418000	435000	443000	471000	432000	479000	528000	494000	447000	589000	449000	422000	519000	581000	438000	435000	398000	514000	429000	386000	665000	453000	485000	478000	548000	375000	498000	464000	435000	521000	554000	505000	443000	452000	469000	513000	453000	408000	475000	478000	493000
D-Erythronolactone	Carbohydrate metabolomics	2150000	2030000	2070000	1960000	2090000	1880000	1870000	1900000	2060000	2100000	2240000	2010000	2180000	2180000	2120000	2000000	2460000	2320000	2110000	2330000	2170000	2090000	2080000	2270000	2350000	2250000	2100000	2570000	2280000	2170000	1950000	2440000	2180000	2170000	2080000	2170000	2010000	2380000	2140000	2230000	1980000	2170000	2300000	2260000	2220000	2330000	2310000	2230000
D-Arabinose	Carbohydrate metabolomics	23400	27400	23200	24300	22200	26300	18200	22200	28700	12800	31300	25200	32500	31100	23700	31000	27400	32300	27800	19200	20700	28400	14400	31300	15900	27600	26400	31900	25700	23300	27100	25100	30900	30600	32100	16000	24900	32100	37900	37000	32300	36200	20400	28400	31700	30100	33700	32100
L-Gulonic-Γ-Lactone	Carbohydrate metabolomics	11000	9940	13100	8370	12000	11000	12000	7850	14100	17800	13600	12000	12600	15700	19900	16200	12800	14700	14700	19400	14900	13600	8900	18100	16000	12000	14700	17600	15200	14400	14100	13900	15700	15200	13100	21500	12600	13900	15900	14700	10500	14700	24600	9420	16700	16800	16300	10500
Vitamin D3	CoOthersEnzyme Factor & vitamin	16100	16400	15600	11600	14000	14400	11700	16900	14000	12700	14900	15700	14100	17000	14600	15300	12700	15200	15500	12800	18000	16000	15500	14700	14800	14900	15300	13300	14900	17000	19200	18200	15600	16500	16500	15600	16900	16900	15500	15300	14800	16800	13700	17400	15900	17700	17400	19200
Azelaic Acid	Organic Acid And Its Derivatives	3010000	3090000	2920000	2840000	2920000	2850000	2910000	2930000	2940000	2930000	3440000	3320000	3170000	3290000	3170000	3400000	3210000	3250000	3430000	3240000	3280000	3400000	3220000	3250000	3210000	3470000	3310000	3470000	3570000	3500000	3200000	3250000	3350000	3390000	3300000	3640000	3630000	3480000	3430000	3310000	3400000	3740000	3680000	3600000	3560000	3580000	3680000	3690000
L-Lactic Acid	Organic Acid And Its Derivatives	7690	11200	16600	12200	13900	8210	4200	4940	9760	8270	11000	21800	6710	11200	15100	11700	14500	8510	13900	5540	15600	9350	10100	9420	10500	22600	9870	12500	24700	22900	17300	15800	16700	17600	10000	13000	5930	20500	12500	15700	12900	18000	20900	7290	18700	17100	14700	13100
Shikimic Acid	Organic Acid And Its Derivatives	22300	9840	11800	3100	16700	20900	12100	14100	18500	28200	12400	51800	41900	20000	15600	17900	22900	19900	55800	12200	48200	798	8180	46900	237000	61100	15700	142000	3060	91200	4200	15400	38300	9840	19800	30900	28100	5870	8630	21100	9740	3380	8790	24100	38800	7130	22600	2010
Subericacid	Organic Acid And Its Derivatives	95800	84500	81700	74900	89300	82300	85500	93500	93200	86200	97800	88500	90400	88700	92300	97200	102000	99800	104000	110000	107000	96000	91900	96200	119000	95700	97800	106000	103000	102000	94100	98800	107000	107000	107000	106000	102000	104000	103000	102000	106000	107000	99800	111000	117000	102000	111000	104000
Lysope 18:1	LipidsOthersPhospholipid	46500	23300	17000	21900	24900	22600	97000	26800	44600	20700	21800	20000	34300	47100	23500	27900	49800	34900	28200	32200	26000	16000	13400	54600	12800	111000	32700	40900	31900	89700	26800	56800	30200	11300	30700	25800	57500	29800	83100	34700	20700	20800	13100	31200	25800	30800	13300	34200
Lysope 18:0	LipidsOthersPhospholipid	21300	10100	5550	5330	11200	8180	21700	14400	23000	10400	10600	11500	17500	23500	11400	18400	25800	23600	21000	21300	10900	4870	4630	37800	6680	63300	19800	25800	21000	34100	13300	22100	24800	3810	13200	17200	28500	22900	80500	12700	12900	7460	7250	22700	18800	23900	4950	25400
Lysope 16:0	LipidsOthersPhospholipid	10400	5580	4840	3880	6450	5670	11000	9160	12300	7530	8330	6850	9000	10200	7400	10200	9630	10800	6230	11100	5150	3980	2010	13500	1870	23500	5810	12900	8460	17300	7450	5930	8200	1890	5600	8510	9180	9920	32500	4000	3850	3030	2760	6570	4890	9400	2520	12000
Lysopa 16:0	LipidsOthersPhospholipid	8110	5760	3420	1570	4880	3400	7880	6710	10200	5700	8490	4260	3390	5990	11600	5800	5450	6680	5120	6060	3750	1090	2160	10100	2140	25400	4970	12700	6060	17900	5730	5290	7440	1680	2840	9480	7490	19200	28400	3370	2980	2420	3420	3500	8700	5110	3890	4070
13-HOTrE [13S-hydroxy-9Z,11E,15Z-octadecatrienoic acid]	Oxidized lipid	27200	21500	21800	20100	21200	22000	20600	23200	19700	21000	23700	21900	25300	24300	21400	21100	22000	21700	22300	24200	23400	18500	23100	20700	23400	21600	21100	26000	23200	23800	22900	21700	21800	23100	21500	23700	22100	21000	21000	19700	22900	19000	21300	23000	24800	22600	23000	25200
9,10-DiHOME [(±)9,10-dihydroxy-12Z-octadecenoic acid]	Oxidized lipid	2070000	2150000	2120000	2130000	2040000	2060000	2130000	2130000	1950000	2080000	2290000	2250000	2120000	2100000	2170000	2190000	2250000	2190000	2150000	2230000	2120000	2130000	2140000	2120000	2120000	2110000	2150000	2160000	2170000	2130000	2040000	2050000	2170000	1980000	2030000	2040000	2080000	2050000	1970000	2000000	1990000	2070000	1960000	2100000	2090000	2090000	2120000	2060000
Tridecanoic Acid	Lipids_Fatty Acids	9700	10300	9200	6830	8740	7510	7790	6750	8130	7180	6530	10200	9530	8770	7300	7410	9010	9730	6700	8310	7370	8270	9150	7740	9320	10100	11600	10400	9630	8500	10900	9880	8990	8930	9690	8770	10100	8760	9470	7990	11200	9560	9280	9570	8890	11100	8140	10300
Palmitoleic Acid (C16:1)	Lipids_Fatty Acids	1590000	1220000	1020000	1000000	944000	1050000	1040000	1010000	849000	851000	935000	939000	852000	927000	857000	931000	956000	905000	910000	928000	899000	825000	861000	798000	816000	932000	843000	864000	908000	938000	850000	880000	998000	845000	894000	864000	812000	794000	886000	778000	831000	737000	766000	713000	671000	698000	710000	709000
Hexadecanoic Acid (C16:0)	Lipids_Fatty Acids	13800000	14600000	12300000	11100000	13500000	13000000	13300000	13000000	13600000	12900000	14400000	15500000	14000000	14000000	15000000	14700000	14600000	13500000	14400000	15100000	12900000	13300000	12400000	13400000	14000000	12500000	14100000	14500000	15200000	15500000	13800000	15000000	15000000	14800000	14000000	14500000	15200000	15000000	15800000	14300000	16400000	14500000	15300000	14200000	12000000	13500000	13100000	11500000
Linoleic Acid (C18:2N6C)	Lipids_Fatty Acids	2350000	2280000	2050000	2280000	2080000	1900000	2040000	1880000	1850000	1910000	2120000	1760000	2020000	2130000	2170000	2010000	2090000	1990000	1880000	2030000	1820000	1800000	1860000	1950000	1980000	2500000	2070000	2170000	1840000	2160000	1860000	1800000	1900000	1930000	1840000	1940000	2110000	2050000	1930000	1850000	1360000	1280000	1400000	1090000	1110000	1040000	1190000	1180000
Dodecanoic Acid(C12:0)	Lipids_Fatty Acids	639000	578000	600000	354000	719000	527000	688000	571000	681000	839000	732000	580000	212000	254000	302000	95600	111000	131000	97500	87500	83500	86400	190000	94700	170000	135000	182000	86300	95200	241000	90700	98500	88400	193000	218000	93600	100000	92200	584000	85200	114000	94400	104000	207000	91500	109000	104000	103000
Elaidic Acid (C18:1N9T)	Lipids_Fatty Acids	6670	6430	7340	7830	6470	7320	7540	8260	8420	6310	9290	9390	7680	10400	10800	7830	9200	11100	10800	7580	7640	8010	8870	8630	7190	15500	8380	10800	9680	12300	10800	9320	11400	10100	8890	9410	9850	10600	11100	9200	8700	9400	11000	8840	7110	9190	9130	8260
EPA [5Z,8Z,11Z,14Z,17Z-eicosapentaenoic acid]	Oxidized lipid	3510	4270	2040	1770	1530	1450	2010	2470	2490	2680	2500	4690	2020	5660	1730	1560	1800	2150	1630	1040	789	501	1170	702	839	4650	838	3740	875	1860	474	800	1430	817	1360	635	747	2700	642	1380	808	593	614	949	1080	3100	1670	11500
Cis-11,14,17-Eicosatrienoic Acid (C20:3)	Lipids_Fatty Acids	38100	47900	48100	43500	46400	39700	32800	34700	40400	54800	54800	40100	48600	37800	52900	52600	51700	57000	61200	53300	42200	40200	64100	44200	55400	56400	51700	37800	40200	38800	64600	41300	39000	58600	50000	58200	57700	43900	41900	66900	45400	31200	40000	29400	38300	35500	33400	24600
Arachidic Acid(C20:0)	Lipids_Fatty Acids	45400	43700	42600	45100	42700	46900	53200	40200	40300	41000	50400	53000	48300	48200	42300	42800	42200	47200	51600	41900	49000	49200	37000	47600	40300	45700	52400	50000	40100	39000	44100	41400	42800	44700	43400	41400	43800	34100	36700	41700	42800	46300	50100	49100	48100	47000	43600	42100
Α-Linolenic Acid(C18:3N3)	Lipids_Fatty Acids	3490	3380	3220	3130	3090	2860	3320	3260	2840	3090	2840	3220	3020	3470	2630	3070	2780	3490	3350	2660	2720	2480	2550	2670	2420	4040	2650	2940	2880	3020	2660	2520	3330	2680	3380	2810	2890	2760	2850	2650	2940	3030	2390	2440	2630	2130	2440	2850
Thiamine Triphosphate	CoOthersEnzyme Factor & vitamin	11500	13200	13300	14600	15700	15400	14600	15100	15800	17100	19600	17000	14800	17200	15600	18900	18700	17000	19700	18800	18300	17100	18700	19900	20100	19600	20200	20700	21000	21300	19000	18500	18900	17000	17400	18700	19500	18700	18500	18300	23800	23300	26500	25500	26800	28800	27000	31700
Oxoadipic Acid	Organic Acid And Its Derivatives	155000	123000	556000	820000	364000	634000	466000	516000	549000	407000	557000	591000	579000	561000	548000	875000	667000	505000	633000	455000	398000	402000	460000	694000	833000	579000	515000	451000	483000	550000	488000	697000	731000	528000	622000	534000	747000	350000	542000	323000	494000	710000	516000	393000	872000	467000	475000	587000
Palmitaldehyde	Lipids_Fatty Acids	1980000	1890000	1640000	1790000	1750000	1650000	1710000	1600000	1640000	1610000	1700000	1600000	1530000	1820000	1700000	1820000	1720000	1860000	1690000	1750000	2130000	1850000	1810000	1810000	1810000	1830000	1830000	1750000	1720000	1920000	1880000	1920000	2170000	1700000	1810000	1830000	2940000	1870000	1880000	1940000	1600000	1740000	1660000	1660000	1690000	1630000	1640000	1900000
9-HOTrE [9S-hydroxy-10E,12Z,15Z-octadecatrienoic acid]	Oxidized lipid	32300	30500	29300	27000	27900	27700	29300	31400	27700	29100	32000	29400	29900	32700	31300	31700	32900	31600	32500	33800	29800	29500	30500	31300	30300	31400	32300	36400	34000	32800	27700	28800	31900	33700	33400	32100	34000	30900	31900	31700	33300	34800	33900	35300	35300	35300	36800	37400
8,15-Dihete	Lipids_Fatty Acids	262000	195000	159000	145000	129000	158000	159000	157000	156000	128000	142000	153000	118000	131000	124000	134000	144000	146000	133000	150000	155000	127000	122000	132000	130000	142000	124000	134000	166000	141000	125000	200000	164000	128000	156000	136000	132000	144000	137000	123000	64500	53600	50400	51300	44400	48000	43900	45400
Argininosuccinic acid	Organic Acid And Its Derivatives	12700	9100	10300	9460	11200	12200	8910	10500	12500	8530	12200	12700	13000	19600	12200	13200	7460	16500	9170	20000	17100	19600	14300	10100	13100	16800	13000	14800	18700	10100	10800	11400	15900	12000	14400	10900	7910	9240	10400	16900	18500	9380	15800	10600	12900	12400	11700	14500
2-Deoxyribose 1-Phosphate	Carbohydrate metabolomics	727000	640000	663000	623000	619000	584000	597000	598000	732000	599000	736000	700000	640000	715000	675000	669000	686000	703000	718000	764000	669000	768000	697000	695000	663000	707000	682000	799000	785000	799000	489000	754000	663000	644000	767000	730000	738000	764000	738000	664000	790000	711000	656000	635000	678000	719000	687000	759000
N-lactoyl-phenylalanine	Organic Acid And Its Derivatives	4570	5470	9510	11300	8810	8010	7210	6620	8180	7230	7230	15300	8460	8240	10600	5870	9570	11200	11200	7870	8150	10400	7220	8810	6530	12300	6120	7110	22700	7910	7670	12200	8250	12200	6000	7820	7140	11000	9320	11700	8540	8270	14100	10700	8260	11400	8780	12000
Glycerol 3-phosphate	Lipids_Fatty Acids	692000	841000	815000	883000	694000	854000	811000	647000	717000	726000	807000	815000	674000	645000	706000	910000	646000	861000	743000	653000	775000	673000	794000	738000	983000	786000	710000	740000	713000	622000	1100000	825000	716000	666000	735000	855000	853000	778000	958000	664000	725000	704000	724000	758000	829000	935000	813000	741000
Tetradecanedioic acid	Lipids_Fatty Acids	89900	83600	91500	93900	91700	87900	86200	83200	91400	84000	105000	102000	90800	95600	86100	106000	102000	101000	101000	92100	92100	101000	92100	98600	103000	102000	104000	98600	96600	103000	94600	97900	105000	103000	97800	101000	98700	106000	101000	91300	101000	105000	102000	112000	114000	114000	109000	118000
6β-hydroxytestosterone	Hormones	3410	3220	3650	2390	4320	3050	3420	3090	3730	3970	5140	3290	4300	3560	4300	3550	3200	2950	2580	3830	4090	2800	2520	3480	4260	4720	4030	3840	4110	4490	3490	3420	4130	4120	3920	4420	3180	4760	4640	5110	4080	2810	3270	4520	2780	4070	4060	4320
Porphobilinogen	Organic Acid And Its Derivatives	50600	60200	49500	56500	57200	44800	56400	46200	49400	56000	46600	48100	49900	52100	44400	47900	48800	53100	62100	47600	61300	63000	60000	58300	52700	66900	40900	49700	45100	48100	49100	50800	73900	47500	45800	64500	77500	70900	72000	70100	50500	64200	50000	64300	47600	55200	62800	68100
N-Oleoyl Glycine	Organic Acid And Its Derivatives	6000	6360	7140	6420	5980	5830	5400	5810	5460	5700	5430	9550	6130	6460	10600	5650	7130	35700	6780	7370	6840	6950	6920	6190	6730	7260	6700	5880	12200	6670	6600	7100	6840	8310	6370	7140	5740	7540	7180	6530	6650	7710	7920	7440	6670	7810	7290	7340
Ginkgoic acid	Organic Acid And Its Derivatives	35800	91000	35300	26300	39200	50600	93200	56600	47900	24500	49800	104000	37400	86900	101000	148000	154000	57400	124000	144000	130000	81200	152000	172000	84400	177000	69500	410000	99800	231000	191000	309000	156000	120000	135000	167000	180000	194000	159000	146000	78300	207000	229000	135000	206000	180000	195000	102000
Succinic anhydride	Organic Acid And Its Derivatives	139000	276000	151000	305000	191000	224000	227000	344000	120000	166000	282000	238000	238000	199000	123000	172000	204000	235000	267000	135000	287000	136000	171000	235000	185000	206000	203000	249000	336000	81800	263000	141000	249000	234000	187000	215000	250000	146000	130000	202000	125000	106000	179000	158000	156000	151000	284000	192000
Indoleacetaldehyde	Indole And Its Derivatives	6980	8600	6870	7540	8540	8110	9670	5690	7080	9090	5000	14100	7220	11100	7780	16800	21100	13200	17400	15000	13200	9200	9940	10300	9010	18500	7860	18100	27600	7090	9110	19700	9810	12800	9610	8370	4580	16500	16500	12900	11200	13600	21300	12500	13500	6850	9140	13400
D-Xylulose 5-phosphate	Carbohydrate metabolomics	1180000	1300000	1280000	1290000	1300000	1220000	1350000	1200000	980000	1130000	1190000	1300000	1210000	1100000	1240000	1240000	1310000	1170000	1360000	1290000	1260000	1120000	1270000	1350000	1490000	1340000	1150000	1220000	1040000	1250000	1480000	1100000	1200000	1240000	1290000	1310000	1050000	1290000	1240000	1390000	1160000	1160000	1100000	1310000	1260000	1130000	1220000	1190000
Hexadecanedioic acid	Lipids_Fatty Acids	76800	82600	78900	74300	78600	73000	72300	75000	70100	72500	81300	88000	72700	80100	71800	89200	83400	80900	82400	79900	76700	89000	79900	83000	82700	89500	81700	90000	88800	96200	82700	86000	88600	84800	86800	92300	98000	95700	84300	83200	92800	97900	99700	103000	99300	98200	106000	102000
Vanillylmandelic acid	Benzene and substituted derivatives	38800	37800	36800	32500	44100	36500	31000	35800	44400	44000	35500	44900	40500	47800	47500	44700	42000	43000	37200	48200	36500	36300	42800	32300	37300	54000	36200	48500	38300	37800	39900	50600	38400	36300	38200	48300	46200	38100	47200	36100	30900	31600	34700	34400	28400	33000	38200	25700
Methylstearate	Fatty acyls	4470	5370	4070	4340	4760	4440	3680	5390	3890	3760	4170	5170	2830	4900	4510	3380	5380	4900	4540	4850	4990	3930	4960	5020	4480	5730	4020	3740	4770	4100	3880	5390	5130	4230	4300	4720	5980	4540	8230	4770	5670	4790	4120	3880	4280	4540	5750	5000
Ethylsalicylate	Organic Acid And Its Derivatives	51600	65200	45300	56600	48300	41400	48200	46600	52400	56100	54300	52500	47900	57100	51100	55600	56300	53700	55200	59200	74000	57200	62800	58500	53300	61600	55600	48400	52300	52600	55400	65700	72700	51900	60100	62500	95600	69700	79200	73100	54400	62400	64900	62300	58900	61600	62700	64100
Octadecanamide	Fatty acyls	51200	44300	45800	43200	52200	42400	40500	47600	45500	43600	50000	54900	44200	45900	46700	49900	49200	51300	50600	57000	45600	47400	49800	47600	42500	50400	52100	51300	46700	48100	47300	45300	55000	45900	48100	60300	46700	48100	46100	46400	51900	54800	48600	47900	52000	52800	52600	57500
2-nonanol	Alcohol	649000	572000	613000	627000	601000	608000	541000	599000	584000	540000	591000	596000	557000	604000	576000	578000	632000	579000	609000	674000	604000	594000	611000	597000	639000	591000	541000	603000	655000	626000	610000	608000	569000	542000	557000	593000	623000	589000	605000	601000	584000	623000	618000	613000	619000	639000	588000	606000
1-Naphthol	Phenols And Its Derivatives	15200	17700	12300	13800	14600	15600	14500	14200	10100	9620	15700	18200	15100	15900	8500	13400	16200	15600	15300	16500	16500	14000	16400	16700	17200	15800	14900	11600	12800	12500	14200	13300	19500	13900	15100	15600	14400	13000	20300	13700	16800	13700	16200	14100	14300	14500	14900	14900
Aspirin	Organic Acid And Its Derivatives	1070000	1670000	1600000	1230000	1690000	1250000	2030000	1250000	1580000	1200000	1560000	1670000	1260000	1170000	1370000	1700000	1420000	1180000	1540000	1600000	1760000	1290000	1780000	1730000	2610000	1430000	1420000	1770000	1470000	1630000	1750000	1190000	1660000	1490000	1590000	1950000	1520000	1790000	1610000	1400000	1520000	1500000	1570000	1480000	1320000	1320000	1320000	1650000
Sorbic acid	Organic Acid And Its Derivatives	55000	49800	44400	47400	49400	45500	63000	80900	56200	40400	49200	52300	51300	39700	50200	47400	56300	50400	41300	47700	47200	54000	59200	42900	52500	55000	49300	55900	56800	43700	78000	62400	43000	59900	45300	52600	54100	51000	79500	61800	57000	73200	49500	70800	52700	83700	71500	78200
Methyl hexadecanoate	Fatty acyls	278000	231000	250000	213000	244000	259000	242000	262000	210000	233000	242000	248000	231000	293000	262000	281000	263000	292000	265000	263000	259000	282000	264000	257000	290000	282000	299000	287000	269000	276000	268000	277000	288000	264000	290000	266000	279000	255000	255000	264000	263000	274000	280000	274000	271000	298000	281000	313000
4-tert-Octylphenol	Phenols And Its Derivatives	654000	710000	650000	573000	622000	565000	533000	564000	521000	529000	597000	660000	668000	664000	658000	658000	624000	656000	645000	653000	688000	608000	663000	640000	618000	706000	689000	632000	686000	664000	666000	691000	708000	626000	681000	712000	714000	647000	732000	679000	707000	652000	714000	672000	664000	694000	694000	697000
RICINOLEIC ACID	Fatty acyls	41100	36600	39200	41200	33000	35500	32700	32900	33100	33200	36800	36300	43800	35500	34300	33900	37900	38100	36100	33900	35500	31200	33400	31500	35400	33000	35000	37000	37600	37000	33200	32400	33200	31700	35800	39100	32800	33700	31200	31000	36700	39600	43100	38900	38100	43800	39500	38400
PHENYL-BETA-D-GLUCOPYRANOSIDE	Carbohydrate metabolomics	224000	232000	188000	180000	207000	201000	215000	202000	209000	197000	227000	237000	218000	225000	237000	231000	223000	209000	218000	231000	202000	202000	200000	210000	209000	201000	218000	225000	232000	251000	216000	228000	238000	225000	224000	221000	240000	231000	239000	217000	252000	234000	234000	217000	188000	205000	207000	181000
Cis-3-Hexenylacetate	Fatty acyls	190000000	185000000	178000000	180000000	182000000	175000000	176000000	175000000	181000000	178000000	193000000	183000000	178000000	186000000	187000000	184000000	191000000	185000000	184000000	191000000	178000000	182000000	186000000	183000000	183000000	178000000	182000000	188000000	179000000	191000000	183000000	178000000	176000000	184000000	187000000	184000000	182000000	185000000	186000000	183000000	183000000	186000000	184000000	189000000	186000000	184000000	189000000	192000000
2-(Methylthio)ethanol	Alcohol	95200	81700	72900	66900	67100	64700	69300	66600	64000	66700	75000	71800	71500	69100	70200	70800	71000	77600	65900	72800	78100	65100	79900	70000	74400	72700	73300	76600	76800	77100	72100	82200	79100	71000	76300	70700	92100	73900	77900	79900	79100	78000	81300	71300	80500	79600	84000	91400
2-Nonanone	Ketones	183000000	178000000	173000000	175000000	182000000	180000000	175000000	175000000	179000000	174000000	187000000	187000000	178000000	184000000	182000000	181000000	190000000	175000000	181000000	192000000	178000000	182000000	184000000	181000000	180000000	178000000	178000000	187000000	185000000	186000000	182000000	188000000	172000000	176000000	179000000	182000000	184000000	187000000	184000000	181000000	184000000	182000000	183000000	186000000	185000000	181000000	185000000	189000000
Propylparaben	Benzoic Acid And Its Derivatives	34500	34400	34000	32400	31600	29600	24700	25300	31500	34000	37800	41900	34100	33300	36900	38200	36000	51700	35400	33700	36000	33800	35800	30900	30600	36800	26400	32800	47900	40200	30800	35200	40300	36300	33000	38300	40900	37400	40300	32200	35200	32700	42700	35400	36300	39500	38100	38500
2,4-Di-tert-butylphenol	Phenols And Its Derivatives	73200	78200	75100	65400	65700	63000	62200	60700	59900	57300	71500	73000	75800	76400	69700	76900	69300	65900	67800	69900	74200	64900	73800	67900	67300	75800	73500	68900	76300	67300	73800	75100	76300	66400	80000	77900	78100	67000	79800	74600	79400	75200	78800	70700	67800	75500	74400	72900
Methylparaben	Benzoic Acid And Its Derivatives	85800	92600	83800	87000	85400	79400	80300	73500	74200	82700	95400	103000	81500	89100	96200	88900	92400	101000	87600	85800	86200	79800	90700	88400	84000	100000	83200	93200	104000	96200	85600	91200	88700	84500	90200	96200	97100	93200	90200	95700	81900	79900	101000	93200	79300	96900	91700	95300
11,12-EET [(±)11,(12)-epoxy-5Z,8Z,14Z-eicosatrienoic acid]	Oxidized lipid	10400	9900	10400	9590	10600	10200	9360	10900	10200	11400	9780	10400	11400	10800	8930	10800	9720	8550	9530	8530	9440	9610	8630	9470	9500	8800	8450	9160	9240	8470	8210	8100	9050	8470	8360	8280	8520	8520	9230	8210	8780	7690	8320	8090	7680	6930	7430	6810
12,13-EpOME [(±)12(13)epoxy-9Z-octadecenoic acid]	Oxidized lipid	2290000	2040000	1990000	1840000	1860000	1860000	1850000	1880000	1730000	1710000	1940000	1880000	1910000	1930000	1870000	1890000	1870000	1950000	1920000	1910000	1910000	1820000	1810000	1870000	1900000	1830000	1890000	1950000	1910000	1840000	1740000	1810000	1840000	1800000	1870000	1840000	1800000	1890000	1750000	1720000	1840000	1870000	1880000	1890000	1870000	1980000	1880000	2010000
13-oxoODE [13-oxo-9Z,11E-octadecadienoic acid]	Oxidized lipid	1140000	1080000	1070000	1010000	1040000	1000000	1020000	983000	959000	939000	1110000	1020000	1030000	1020000	1030000	1070000	1060000	1070000	1120000	1080000	933000	1010000	1040000	1000000	1070000	979000	1010000	1020000	1040000	1030000	945000	970000	956000	980000	1010000	993000	1010000	1020000	855000	945000	943000	1000000	1040000	1020000	1000000	1110000	1080000	1080000
9,10-EpOME [(±)9,10-epoxy-12Z-octadecenoic acid]	Oxidized lipid	7060000	6290000	6100000	5850000	5750000	5850000	5810000	5870000	5510000	5590000	6290000	6090000	5890000	6030000	6130000	6090000	5970000	6130000	6060000	6050000	5830000	5650000	5930000	6060000	5960000	5820000	5950000	6020000	6080000	5920000	5530000	5730000	5970000	5660000	5820000	5850000	5820000	6070000	5520000	5260000	5770000	5940000	5950000	6130000	5800000	6200000	5910000	6020000
9-oxoODE [9-oxo-10E,12Z-octadecadienoic acid]	Oxidized lipid	1390000	1130000	1030000	991000	1030000	1050000	1040000	1060000	986000	974000	1160000	1160000	1040000	1030000	1090000	1070000	1140000	1150000	1110000	1120000	1070000	1100000	1070000	1130000	1040000	1110000	1070000	1150000	1180000	1100000	1120000	1240000	1160000	1090000	1130000	1130000	1200000	1150000	1370000	1000000	1100000	1140000	1180000	1140000	1180000	1150000	1250000	1290000
PGK1 [9,11-dioxo-15S-hydroxy-prost-13E-en-1-oic acid]	Oxidized lipid	12000	15900	12200	15200	13000	13600	12400	13000	15100	11700	17500	14700	16200	15200	16100	17500	17200	15900	16100	15100	16500	13800	18400	17100	17500	16800	15000	16500	17900	16900	17000	15600	17900	16900	17000	16500	18500	17700	14400	16400	17100	17400	18600	16700	16100	15700	20800	17400
Xylose	Carbohydrate metabolomics	16700	18400	25400	9870	15400	14200	20900	19300	17100	11800	18400	17000	16100	24900	18600	17000	20300	17100	20400	22000	14600	21300	17800	16200	16500	18300	21400	21000	11900	19400	24400	22100	23600	23000	15200	18500	19100	22200	19500	14500	22200	16900	19100	15300	16400	18800	30700	18700
Scyllo inositol	Alcohol	3670	5260	6510	4610	9660	4610	7250	4980	3780	4550	3740	10000	5150	1260	5020	5410	4180	2240	6060	3760	5870	4140	5330	11300	7750	2080	8380	3790	3350	8420	7890	5440	2900	4130	5970	10800	4620	5570	7100	3580	4760	6400	6880	4460	4110	2500	5800	4920
Nonadecylic acid	Lipids_Fatty Acids	5880	3480	3640	3130	2810	3180	2440	2860	4980	5590	2770	1970	2310	1660	1760	1880	3230	1490	2670	1690	2190	2020	1980	1690	2260	2190	3120	3160	3140	1930	2470	2480	2710	2680	2990	3120	2350	2800	3970	2450	3210	2860	2770	3290	2150	2690	3050	2850
Mono-Methyl Glutarate	Organic Acid And Its Derivatives	713000	539000	189000	174000	213000	218000	190000	229000	238000	208000	266000	271000	290000	271000	266000	162000	229000	239000	247000	170000	194000	253000	300000	248000	318000	185000	259000	345000	421000	347000	334000	219000	295000	316000	303000	353000	260000	359000	398000	310000	295000	215000	440000	330000	331000	397000	326000	339000
L-Tyrosine	Amino Acid metabolomics	229000	328000	337000	538000	377000	355000	605000	235000	271000	267000	268000	829000	450000	491000	381000	986000	626000	631000	486000	457000	507000	443000	278000	525000	304000	570000	330000	426000	1390000	327000	391000	782000	483000	626000	325000	453000	340000	657000	525000	602000	421000	421000	912000	399000	410000	471000	324000	633000
L-Leucine	Amino Acid metabolomics	395000	562000	479000	700000	698000	535000	760000	402000	485000	402000	482000	1240000	449000	670000	710000	849000	1030000	829000	897000	627000	926000	665000	410000	906000	480000	1020000	413000	966000	1890000	576000	656000	897000	845000	998000	579000	876000	557000	1240000	948000	844000	545000	604000	1410000	562000	820000	742000	754000	858000
L-Methionine	Amino Acid metabolomics	49500	55000	57000	40100	38800	48200	64000	54200	36000	64100	64200	94600	56800	64100	76900	80300	90400	72900	80900	91700	90200	61700	38500	70500	43800	79400	59500	105000	125000	70000	60700	134000	60500	71100	88100	61000	56000	101000	84800	78400	54900	87700	146000	51400	84100	73900	57500	66500
L-Phenylalanine	Amino Acid metabolomics	4580000	4820000	5070000	5130000	5190000	4830000	4940000	5220000	5480000	5240000	5220000	7120000	5690000	5910000	5820000	6000000	6530000	6430000	6310000	5590000	6430000	6310000	5610000	6270000	5480000	6440000	5600000	6130000	9140000	6310000	6240000	7290000	6520000	7130000	5880000	6150000	5640000	7420000	7010000	6690000	5850000	6440000	8310000	6130000	7130000	6470000	6530000	6620000
L-Proline	Amino Acid metabolomics	110000	282000	199000	364000	122000	160000	475000	152000	113000	163000	209000	538000	249000	271000	235000	339000	413000	266000	385000	248000	355000	464000	145000	267000	218000	321000	202000	697000	483000	343000	239000	492000	204000	202000	237000	345000	172000	314000	292000	450000	224000	197000	373000	171000	333000	328000	219000	194000
L-Valine	Amino Acid metabolomics	142000	394000	308000	264000	301000	247000	414000	187000	144000	207000	261000	531000	308000	436000	474000	484000	606000	402000	418000	393000	410000	482000	330000	473000	361000	487000	312000	503000	739000	401000	493000	402000	442000	384000	371000	464000	428000	707000	365000	527000	414000	464000	681000	306000	442000	486000	390000	327000
3-Chloro-L-Tyrosine	Amino Acid metabolomics	59400	57200	65700	54600	61900	66100	58800	70500	66200	62900	66100	61800	72900	59000	56600	59900	54800	64200	57800	60700	62100	61100	63900	63200	64500	66900	68200	63400	68100	59000	70000	57600	62600	58300	64400	64700	62700	71400	67600	65600	57000	63000	58500	72700	63300	71600	64800	58700
Betaine	Alkaloid	75900	222000	102000	138000	110000	78500	230000	139000	101000	91100	161000	108000	130000	107000	140000	440000	170000	99400	175000	148000	347000	476000	86400	272000	116000	219000	125000	379000	190000	182000	210000	109000	247000	135000	127000	176000	177000	175000	119000	205000	95500	121000	160000	250000	139000	136000	109000	128000
L-Homocystine	Amino Acid metabolomics	134000	138000	136000	119000	130000	87500	128000	113000	110000	76300	75600	87000	72800	131000	136000	112000	96600	87900	104000	211000	162000	128000	126000	115000	65800	81400	90900	86600	107000	108000	119000	106000	85800	57700	137000	144000	125000	129000	85700	78400	81700	109000	71400	69200	91900	112000	136000	181000
Phenylacetyl-L-Glutamine	Amino Acid metabolomics	11500	12000	6500	10700	7820	5910	12000	6300	9180	6850	7650	9950	31000	12600	4830	5160	12800	15500	8500	6920	12400	4750	36900	35300	23700	44100	14300	32100	3190	21200	19600	30600	9770	8020	16700	28400	26900	17600	34600	10800	8160	4380	17700	13400	30900	10800	7800	6870
Phe-Phe	Amino Acid metabolomics	17300	21000	26100	26400	20500	23400	30300	23800	25200	28300	23100	28300	25500	23700	25700	29500	19600	25600	23300	23300	22500	22800	21500	25800	31000	26300	28100	25400	28300	24700	24400	23800	27200	28300	24700	30600	26200	27400	22000	24600	22200	25900	26700	30200	24700	26200	29800	27500
Urea	Amino Acid metabolomics	309000	474000	338000	651000	261000	210000	547000	301000	332000	412000	483000	724000	523000	524000	468000	501000	878000	657000	577000	640000	628000	297000	308000	717000	433000	645000	271000	869000	702000	459000	722000	572000	568000	526000	473000	472000	563000	689000	614000	693000	424000	674000	1150000	718000	941000	565000	731000	551000
4-Ethylbenzoic Acid	Benzene and substituted derivatives	91100	95100	98000	97300	85900	106000	93600	108000	87800	95900	98000	97400	93800	105000	105000	105000	110000	102000	100000	104000	90200	93600	108000	104000	99400	97600	99000	109000	108000	107000	106000	109000	105000	105000	98100	119000	106000	116000	96400	107000	99600	93400	98900	91500	109000	98700	99200	99600
Phthalic Acid	Benzene and substituted derivatives	49800000	53300000	54200000	46400000	56500000	52500000	47300000	53800000	57600000	60100000	57900000	61500000	61500000	60600000	61600000	62000000	60100000	59200000	60400000	58900000	60800000	63700000	65100000	62800000	58500000	60200000	60000000	57600000	62700000	67800000	62500000	61600000	62900000	63200000	62100000	62500000	63500000	65300000	67000000	66000000	63800000	65900000	68100000	66200000	63100000	64400000	63000000	65200000
Phenethylamine	Polyamine	5580000	5860000	6580000	5080000	6240000	5470000	5580000	6140000	6420000	6540000	6860000	7020000	7130000	6580000	7100000	6830000	7370000	6550000	6890000	7030000	6380000	7210000	7540000	6990000	6450000	6930000	6760000	6260000	7020000	7380000	6820000	7120000	6750000	6960000	7350000	7300000	7440000	7580000	8140000	7730000	6870000	7410000	7900000	7370000	7080000	7390000	6910000	7790000
Adenine	Nucleotide metabolomics	262000	237000	328000	256000	319000	335000	237000	169000	256000	235000	335000	269000	138000	204000	201000	232000	299000	218000	197000	249000	236000	232000	190000	318000	224000	185000	177000	213000	239000	244000	268000	174000	156000	192000	168000	236000	232000	249000	281000	254000	163000	233000	218000	300000	282000	180000	200000	284000
Adenosine	Nucleotide metabolomics	1370000	943000	931000	930000	761000	863000	1110000	1320000	881000	587000	705000	2360000	1150000	808000	546000	610000	634000	589000	550000	364000	432000	543000	1380000	622000	1250000	644000	1670000	475000	448000	944000	1010000	715000	473000	1160000	1020000	371000	403000	466000	507000	1120000	434000	478000	533000	2960000	651000	1130000	752000	1430000
Cytosine	Nucleotide metabolomics	49900	52100	74500	47500	49000	77700	77400	55500	68800	80500	72300	61900	62600	55700	90000	80400	61200	66400	83000	84300	59000	73200	66500	76300	64600	50400	74200	64700	74000	64000	40200	45200	67200	40700	82900	52900	93000	71200	83200	78700	53000	72100	54200	70400	78300	63900	65400	67400
Purine	Nucleotide metabolomics	1360000	1440000	1540000	1180000	1540000	1350000	1310000	1520000	1590000	1570000	1640000	1650000	1720000	1590000	1670000	1690000	1780000	1580000	1650000	1700000	1530000	1750000	1800000	1710000	1590000	1710000	1660000	1560000	1740000	1820000	1710000	1650000	1770000	1750000	1740000	1770000	1830000	1860000	2030000	1830000	1640000	1720000	1860000	1860000	1780000	1830000	1740000	1920000
D-Melezitose	Carbohydrate metabolomics	14600	16500	7000	14600	17400	14800	12000	15400	9680	17800	9100	9180	16900	20400	16700	10800	8590	23500	16200	13700	19400	19900	9530	12200	15100	9680	13100	11500	13000	13100	18900	12000	12700	9730	14100	17300	22000	12000	16500	14200	7710	15500	12900	11600	13600	23600	13400	19400
Raffinose	Carbohydrate metabolomics	14900	20500	13200	19300	9670	19000	18700	24100	6120	13600	16700	9600	13600	15200	12400	21800	16900	16100	9410	21200	15300	12800	21300	11100	16000	12300	11100	24000	13000	13300	12700	13100	15100	13300	23000	10500	25200	15100	12400	9820	13000	18900	17500	15600	16500	9840	19100	19800
D-Glucoronic Acid	Carbohydrate metabolomics	12300	1780	7060	42.5	928	20700	112	3330	19200	21400	27400	14800	1100	1740	3720	8050	98.8	52.1	12000	104	4620	8280	139	7870	2040	1500	1840	1780	2960	9410	2050	33400	6810	35900	480	6190	27400	1460	859	280	1040	1020	584	2320	2880	13400	26600	840
Pyridoxine	CoOthersEnzyme Factor & vitamin	95200	95600	98800	91500	130000	90400	105000	99800	125000	102000	98900	97200	128000	136000	75200	145000	119000	150000	121000	113000	114000	149000	145000	121000	87200	152000	125000	122000	131000	121000	63900	142000	133000	104000	140000	97900	129000	125000	128000	96100	122000	122000	149000	138000	135000	123000	82700	120000
Nicotinamide	CoOthersEnzyme Factor & vitamin	125000	281000	167000	106000	172000	105000	113000	132000	129000	163000	186000	183000	162000	164000	192000	214000	181000	164000	191000	192000	227000	154000	182000	221000	138000	163000	106000	163000	204000	243000	185000	156000	201000	160000	210000	208000	182000	203000	177000	200000	224000	147000	206000	146000	181000	194000	192000	200000
Pantothenol	CoOthersEnzyme Factor & vitamin	12500	77400	18300	17000	27600	9220	18000	17400	15300	18100	26200	37600	24800	14600	20300	16900	33600	12500	36900	21000	25700	27000	16900	27900	10400	20600	30200	10700	42400	30300	92600	16200	43200	54000	53400	23200	31000	10700	18300	26700	19900	42700	23400	61100	16000	23400	22000	51200
Riboflavin	CoOthersEnzyme Factor & vitamin	64900	72900	76400	62400	70200	62000	58900	79900	65700	65200	73600	73800	73500	70200	87200	78000	90000	79000	91700	89700	74200	80900	77600	103000	98000	94200	93200	89900	86100	78200	76300	85500	78300	82100	76900	79600	74400	90400	67800	57300	67000	67300	69700	71000	76600	75100	67600	68000
1-Naphthylacetic Acid	Organic Acid And Its Derivatives	5570	9250	11000	3140	10800	5160	6120	8000	6710	5330	9300	8780	4600	6950	7850	12000	5660	6260	9700	5850	10800	5810	7070	8290	13300	8340	8540	10600	6260	9530	11800	6170	11500	8780	8390	10800	8660	12800	7720	15700	9700	6050	6940	8500	6140	7680	10200	9540
6-Aminocaproic Acid	Organic Acid And Its Derivatives	71100	93800	102000	151000	116000	78200	112000	70800	78200	92000	77300	198000	85500	111000	143000	130000	162000	143000	149000	93300	114000	124000	76700	126000	74300	165000	83400	153000	355000	110000	106000	142000	140000	161000	90900	147000	88900	174000	166000	159000	98500	111000	199000	94600	102000	148000	117000	181000
7-Methyluric Acid	Organic Acid And Its Derivatives	395000	437000	454000	453000	422000	428000	422000	398000	445000	451000	433000	465000	434000	451000	467000	468000	452000	458000	450000	477000	461000	424000	452000	484000	447000	444000	442000	425000	425000	461000	446000	459000	472000	451000	460000	476000	477000	480000	438000	466000	389000	382000	488000	452000	408000	424000	433000	401000
Hippuric Acid	Organic Acid And Its Derivatives	26000	5540	7550	10200	10000	7790	13400	6010	6110	5230	6210	12500	11400	18000	4700	4260	26300	5710	5360	5990	5520	3300	21400	12100	12100	26400	14000	13000	5670	7020	9000	19500	7500	6310	13900	8510	4320	2860	19700	8060	7030	3820	4720	4220	5060	6630	6460	5860
Homovanillic Acid	Organic Acid And Its Derivatives	59800	43700	82300	65100	57400	44800	96000	42300	50700	37600	37400	83500	74500	63200	59200	96400	86100	90700	64800	42100	68900	51400	37400	74500	66900	88700	54200	47800	139000	82400	63100	97100	59000	100000	64100	50700	56500	78800	73700	78500	54000	65900	120000	45500	57200	49900	62300	93100
Cinnamic Acid	Organic Acid And Its Derivatives	71000	69500	88300	75200	95600	91900	74000	65300	95900	79700	100000	85100	83400	83000	75200	82400	101000	97900	82200	103000	86500	91500	129000	96700	97200	106000	105000	88800	110000	100000	103000	99400	109000	103000	98400	97700	113000	109000	114000	119000	102000	87700	116000	94000	116000	107000	102000	115000
Lysopc 14:0	LipidsOthersPhospholipid	76700	31700	19900	28900	41100	49900	127000	22700	74100	46600	55700	22400	28300	66800	66800	59000	128000	98800	108000	75900	32800	17900	7980	76000	15700	474000	37600	179000	33400	93800	15500	106000	48600	11300	58400	44800	40300	199000	264000	22800	23100	19200	13600	38900	128000	35800	14300	27900
Lysopc 16:0	LipidsOthersPhospholipid	4580000	2330000	1320000	1080000	2020000	1720000	4910000	3250000	5230000	3080000	4900000	2350000	2170000	2630000	6800000	3520000	3220000	3460000	2670000	2960000	2330000	805000	742000	5600000	2060000	15400000	2870000	8330000	2820000	10600000	2440000	2630000	4220000	781000	1830000	4660000	4610000	10100000	18700000	1390000	1160000	1050000	1410000	1640000	4490000	3350000	2350000	2890000
Lysopc 16:1	LipidsOthersPhospholipid	67400	27100	14100	93200	32300	107000	202000	25100	107000	35100	128000	38500	16000	74600	47800	33300	41900	36500	64700	50400	16300	15100	6310	23500	8730	137000	22300	56900	14700	48400	9340	34100	46100	8550	20700	38500	19000	67000	36800	11100	9120	16000	9840	63500	46400	24800	12800	64200
Lysopc 18:0	LipidsOthersPhospholipid	8920000	4910000	1950000	1690000	2790000	2490000	8100000	5050000	7780000	4480000	6090000	4160000	4380000	6700000	10700000	7240000	8050000	7530000	7720000	5780000	3500000	916000	1550000	13800000	4440000	25200000	6340000	15100000	4520000	18500000	4230000	6070000	8880000	2020000	4350000	8310000	13900000	20900000	30000000	3950000	2290000	1770000	2350000	3700000	8210000	5260000	4680000	5650000
Lysopc 18:1	LipidsOthersPhospholipid	1660000	862000	532000	819000	875000	1280000	4420000	1620000	2120000	1280000	2940000	1430000	1430000	2470000	2510000	1930000	2020000	1760000	2230000	1930000	1200000	539000	558000	2470000	626000	7150000	2020000	3800000	1140000	6700000	1300000	2510000	2150000	440000	1310000	2210000	2500000	4740000	4720000	1280000	795000	677000	640000	1390000	2390000	1830000	1140000	1520000
Lysopc 18:2	LipidsOthersPhospholipid	4180000	401000	356000	7720000	1060000	11400000	7190000	1710000	2480000	1110000	5130000	2260000	1230000	1690000	1810000	1150000	795000	987000	1000000	793000	453000	282000	300000	864000	204000	1430000	1480000	1340000	581000	2770000	469000	855000	4250000	336000	1200000	624000	691000	880000	1290000	497000	273000	249000	365000	4110000	533000	943000	668000	4060000
Lysopc 20:1	LipidsOthersPhospholipid	18600	14000	6000	4270	6390	6760	22800	21200	23500	14800	24400	18100	18800	34200	38500	25100	36900	29900	36900	14400	14500	6590	7500	39400	14500	111000	33600	66300	17300	118000	26700	41300	40300	4340	15600	42400	49600	83600	101000	40200	11900	5050	8320	9390	16900	23700	14100	24400
Lysopc 20:2	LipidsOthersPhospholipid	34700	14200	7440	19700	17000	29100	126000	34600	39400	22200	56400	31400	27900	39800	42100	37200	28500	44900	43400	36400	16700	9470	13000	65900	15200	137000	41800	77300	43900	146000	29900	58300	56800	8850	32100	42500	61300	88700	144000	18000	12500	13500	13900	61000	44800	24600	20000	41700
Urocanic Acid	Organic Acid And Its Derivatives	193000	536000	659000	1160000	892000	756000	601000	317000	461000	507000	308000	1350000	491000	577000	663000	447000	1210000	944000	871000	455000	844000	889000	328000	703000	545000	1020000	478000	250000	3160000	434000	499000	649000	688000	1300000	384000	796000	300000	741000	1020000	988000	685000	642000	1380000	533000	368000	651000	698000	657000
4-Hydroxybenzaldehyde	Benzene and substituted derivatives	1170000	1200000	1440000	1060000	1380000	982000	1310000	1460000	1220000	1390000	1340000	1560000	1460000	1410000	1610000	1290000	1660000	1540000	1380000	1480000	1390000	1470000	1550000	1510000	1210000	1510000	1750000	1250000	1580000	1580000	1770000	1610000	1790000	1870000	1840000	1670000	1570000	1750000	1690000	1900000	1420000	1730000	1760000	1900000	1770000	1730000	1840000	1750000
Taurocholic Acid Sodium Salt Hydrate	Organic Acid And Its Derivatives	4090000	3860000	3980000	3870000	3650000	3630000	3860000	3860000	3950000	3860000	3590000	3910000	3820000	3670000	3830000	3780000	4270000	4260000	4000000	3910000	3910000	4160000	3970000	4130000	4030000	3860000	4210000	4090000	4240000	3960000	4170000	4100000	3920000	4120000	3930000	4380000	4450000	4540000	4100000	3750000	7360000	7280000	7200000	6550000	7040000	6830000	6850000	7300000
2-(Formylamino)Benzoic Acid	Benzene and substituted derivatives	332000	396000	387000	371000	420000	403000	364000	386000	378000	417000	411000	554000	441000	460000	469000	468000	517000	506000	484000	442000	470000	496000	437000	500000	456000	485000	413000	480000	703000	498000	456000	557000	508000	560000	433000	478000	457000	556000	562000	490000	468000	488000	671000	486000	546000	504000	499000	518000
N-Acetylglycine	Amino Acid metabolomics	144000	279000	227000	212000	144000	119000	283000	192000	96400	96900	230000	226000	203000	207000	189000	727000	238000	251000	250000	300000	518000	638000	186000	346000	161000	371000	194000	512000	285000	288000	276000	173000	371000	126000	249000	183000	253000	282000	167000	296000	140000	204000	218000	314000	224000	236000	278000	199000
7-Methylguanine	Nucleotide metabolomics	787000	885000	987000	892000	994000	904000	927000	912000	989000	983000	1020000	1320000	1050000	1080000	1070000	1150000	1200000	1210000	1170000	1090000	1180000	1160000	1090000	1170000	1060000	1210000	1040000	1180000	1660000	1150000	1170000	1360000	1210000	1330000	1070000	1120000	1090000	1400000	1350000	1290000	1150000	1210000	1580000	1190000	1360000	1210000	1260000	1260000
Pantetheine	CoOthersEnzyme Factor & vitamin	17000000	17700000	19800000	15600000	17800000	15400000	14800000	15500000	16100000	16300000	16000000	17600000	18300000	16200000	17700000	17800000	18200000	17600000	17400000	17000000	18200000	14100000	19300000	17700000	18300000	20100000	20300000	18000000	18400000	17300000	18400000	18300000	20200000	17700000	19000000	18600000	16900000	19000000	18300000	17100000	15700000	14900000	15500000	15500000	14100000	15000000	15800000	13800000
L-Pipecolic Acid	Amino Acid metabolomics	22100	53600	56600	81800	50500	66300	82900	42100	56000	72800	43700	98400	51100	66800	62000	76700	74000	76100	72500	36000	79500	70600	43400	56600	28400	80300	45600	87800	199000	63100	53400	78300	85700	78600	32000	71600	47100	79100	72500	67400	59800	64000	135000	90400	64400	75500	61400	98400
6-Phosphogluconic Acid Trisodium Salt	Carbohydrate metabolomics	2970000	3170000	4040000	1800000	6220000	3220000	3010000	2750000	2460000	6160000	6790000	2700000	8360000	2930000	3250000	7090000	2830000	1820000	3510000	3760000	5320000	2700000	2890000	3330000	8510000	4640000	4340000	3080000	6810000	4160000	4940000	3240000	3250000	8490000	4340000	4560000	4150000	7970000	6920000	7840000	7520000	4800000	2800000	3800000	3190000	7640000	5810000	8080000
Phosphoric Acid	Organic Acid And Its Derivatives	103000000	142000000	134000000	125000000	142000000	119000000	164000000	118000000	132000000	118000000	132000000	136000000	128000000	117000000	128000000	148000000	123000000	119000000	143000000	129000000	133000000	129000000	152000000	154000000	202000000	138000000	134000000	140000000	134000000	138000000	166000000	118000000	157000000	139000000	144000000	164000000	147000000	143000000	150000000	143000000	128000000	142000000	106000000	140000000	117000000	133000000	135000000	143000000
Cholesterol	Lipids	678000	691000	680000	482000	2350000	652000	1530000	1760000	714000	2410000	813000	662000	825000	947000	1050000	887000	1820000	646000	798000	825000	737000	770000	841000	1120000	1060000	2100000	2530000	2030000	743000	1010000	2230000	821000	886000	1040000	1000000	951000	896000	853000	857000	731000	729000	2750000	826000	2210000	706000	912000	2420000	776000
Punicic Acid	Lipids_Fatty Acids	1750000	1780000	1700000	1710000	1670000	1680000	1650000	1710000	1690000	1160000	1610000	1640000	1640000	1640000	1630000	1670000	1710000	1710000	1650000	1650000	1680000	1170000	1680000	1670000	1660000	1640000	1670000	1610000	1670000	1610000	1610000	1590000	1580000	1580000	1610000	1600000	1630000	1580000	1470000	1560000	1540000	1520000	1580000	1570000	1550000	1590000	1590000	1600000
Lysopc 17:0	LipidsOthersPhospholipid	78500	53300	24500	20200	43100	27400	62300	80200	78900	52800	97400	61500	53000	63800	141000	90200	67800	92900	84200	73700	44500	10700	17400	155000	53900	324000	61700	205000	47600	273000	56200	68000	102000	15400	48000	85600	134000	241000	383000	43900	25000	18900	26500	38000	107000	70300	53700	73700
6-Methylmercaptopurine	Nucleotide metabolomics	148000000	157000000	156000000	144000000	163000000	154000000	144000000	156000000	163000000	166000000	162000000	164000000	165000000	166000000	171000000	170000000	166000000	162000000	165000000	166000000	167000000	173000000	172000000	166000000	160000000	165000000	164000000	160000000	169000000	175000000	164000000	165000000	165000000	166000000	167000000	170000000	171000000	170000000	172000000	168000000	169000000	174000000	176000000	171000000	163000000	165000000	166000000	172000000
Indole	Indole And Its Derivatives	6010000	6100000	6580000	5400000	6440000	5860000	5650000	6600000	6740000	6810000	6680000	7070000	7270000	7030000	6960000	6920000	7160000	6810000	7240000	6990000	7030000	7130000	7160000	7000000	6860000	7040000	7240000	6630000	7330000	7840000	7160000	7070000	7350000	7500000	7380000	7260000	7350000	7590000	8010000	7250000	7170000	7340000	7650000	7630000	7310000	7620000	7370000	7600000
Lysopc 15:0	LipidsOthersPhospholipid	40800	22200	16500	20000	29700	28000	31500	39000	43100	39700	66000	31200	23500	28300	85700	52700	37000	53200	38900	39900	24100	10200	6920	53900	13100	217000	22900	97500	24700	106000	18500	40300	39800	5680	24900	27400	35000	126000	174000	12200	13700	10300	9790	16400	67300	29300	15000	24500
Lysopc 18:3	LipidsOthersPhospholipid	1440000	684000	391000	316000	582000	505000	1390000	928000	1460000	880000	1370000	668000	625000	786000	1950000	1040000	940000	1020000	765000	873000	686000	235000	216000	1570000	576000	4630000	831000	2410000	833000	3070000	712000	771000	1210000	229000	543000	1360000	1360000	3030000	5680000	406000	302000	262000	328000	375000	1040000	785000	542000	675000
2-Hydroxycinnamic acid	Benzene and substituted derivatives	80700	116000	143000	142000	135000	99100	197000	81700	84000	80100	107000	225000	135000	118000	104000	277000	170000	201000	152000	134000	170000	152000	95900	131000	91100	188000	107000	114000	385000	118000	87500	218000	146000	191000	106000	142000	90700	159000	197000	142000	102000	135000	279000	109000	122000	130000	112000	178000
Acetyl-L-carnitine	Camitine	110000	173000	149000	68000	178000	113000	204000	172000	295000	157000	366000	208000	95200	350000	215000	293000	276000	306000	241000	316000	201000	249000	135000	415000	102000	205000	91100	302000	128000	184000	324000	252000	274000	195000	139000	398000	396000	287000	183000	134000	114000	127000	325000	116000	320000	413000	243000	267000
Hexadecanamide	Lipids_Fatty Acids	948000	826000	1370000	573000	1130000	912000	983000	1590000	2090000	2440000	1980000	2480000	1110000	1420000	1260000	3660000	2050000	1370000	2530000	4310000	2230000	1750000	1640000	2140000	6290000	4840000	1860000	2150000	1940000	7440000	2650000	4110000	3960000	2120000	1670000	3480000	3930000	2270000	8530000	940000	1240000	1480000	1360000	3450000	1090000	2350000	2360000	1520000
N-Acetyl-L-alanine	Organic Acid And Its Derivatives	14400	16400	21100	27300	10000	17200	36400	32300	34000	22700	36500	41100	13200	39700	13400	39500	68200	33600	17100	54000	15300	20100	5710	13600	28500	23000	11200	16300	27500	13500	19400	32100	19700	13100	16300	13800	10300	70300	65900	23000	18100	19200	59900	17300	57300	42000	10800	44000
15-deoxy-δ-12,14-PGJ2	Lipids_Fatty Acids	70300	99500	58500	73700	52000	62100	57500	62700	72700	59300	66600	69200	63100	55000	67600	60300	81200	75600	56600	75500	64400	67300	73100	68700	67700	60700	94800	54600	61300	66600	69600	67400	73100	64800	73200	65300	66800	79500	80400	68600	59300	56400	60400	59200	56300	70300	60200	67900
PAF C-16	Lipids	9770000	5400000	2170000	1830000	3040000	2720000	9140000	5710000	8420000	4650000	6730000	4570000	4790000	7290000	12000000	7970000	8640000	8270000	8490000	6240000	3660000	955000	1720000	15000000	4830000	27200000	6830000	16500000	4980000	20000000	4630000	6690000	9690000	2150000	4610000	8900000	15100000	23300000	32300000	4200000	2530000	1950000	2540000	4090000	8900000	5860000	5290000	6100000
2-Pyrrolidinone	Benzene and substituted derivatives	512	279000	314000	171000	218000	106000	220000	95200	60500	85000	301000	404000	247000	305000	328000	237000	103000	144000	146000	186000	347000	146000	437000	356000	340000	296000	389000	146000	187000	318000	287000	164000	244000	371000	477000	331000	229000	302000	94600	408000	235000	199000	275000	337000	221000	236000	285000	429000
Oleamide	Lipids_Fatty Acids	4030000	2280000	3650000	1760000	4140000	3810000	3440000	6460000	10100000	9950000	8790000	10100000	5990000	9030000	6440000	16500000	10900000	6900000	12100000	19800000	9490000	8200000	7740000	7180000	18300000	21100000	8350000	10500000	9340000	28300000	12000000	19200000	15200000	8700000	9740000	12700000	20500000	9900000	45100000	5060000	5650000	6640000	6220000	13800000	4780000	8720000	8580000	4900000
alpha-Cadinene	Lipids_Fatty Acids	93800	110000	109000	89400	105000	108000	97200	100000	86800	96000	104000	110000	98600	101000	99300	121000	119000	113000	114000	105000	112000	90600	121000	106000	113000	112000	103000	125000	105000	99800	114000	124000	118000	109000	119000	119000	105000	116000	116000	91600	91200	85800	101000	91000	82900	89800	101000	91100
Stearidonic Acid	Lipids_Fatty Acids	78900	65400	60400	45100	49600	69300	68400	66100	52200	88500	134000	62900	143000	157000	71600	82200	57900	66500	102000	65500	76800	179000	58100	76700	131000	157000	98000	71600	141000	110000	74900	122000	96400	165000	142000	85200	126000	90000	126000	143000	123000	129000	105000	88600	172000	163000	182000	209000
N-Acetylphenylalanine	Organic Acid And Its Derivatives	61700	78000	67200	71000	77600	82300	80000	78300	70000	85000	71000	79200	79700	88800	82000	81900	89000	76200	88900	82600	90400	79300	81800	95800	81900	91000	94100	84700	95800	85300	92500	96700	90000	76700	91100	85100	98600	99700	81000	93100	111000	117000	126000	108000	104000	114000	122000	132000
p-Mentha-1,3,8-triene	Lipids_Fatty Acids	1740000	1370000	1550000	1040000	1020000	1370000	1860000	1600000	1280000	2310000	3640000	882000	4360000	5300000	1220000	2220000	1140000	1230000	2410000	1300000	1300000	4590000	934000	1390000	3100000	4400000	2490000	1580000	3540000	2700000	1230000	1980000	1390000	3920000	2890000	1710000	2700000	2040000	1250000	3330000	2030000	2180000	1540000	1240000	2710000	2670000	2650000	3460000
Spermidine	Polyamine	438000	347000	381000	398000	454000	471000	294000	400000	391000	396000	367000	358000	349000	425000	382000	403000	389000	365000	390000	375000	372000	424000	413000	427000	330000	411000	401000	402000	400000	448000	323000	467000	395000	345000	368000	419000	397000	346000	355000	329000	423000	361000	317000	362000	370000	335000	314000	370000
Cuminaldehyde	Lipids_Fatty Acids	107000	109000	132000	123000	135000	132000	94600	106000	105000	136000	128000	165000	137000	133000	129000	131000	149000	124000	139000	134000	133000	137000	135000	132000	120000	153000	133000	135000	171000	141000	137000	174000	134000	148000	137000	135000	131000	189000	172000	156000	142000	146000	168000	157000	161000	153000	159000	151000
2-(3,4-dimethoxyphenyl)ethanamine	Benzene and substituted derivatives	71500	114000	126000	181000	172000	124000	182000	62900	99300	105000	90200	269000	163000	152000	109000	321000	218000	193000	142000	156000	170000	145000	84000	149000	102000	223000	102000	135000	492000	136000	131000	269000	182000	185000	94700	137000	77100	195000	207000	186000	134000	124000	320000	128000	147000	165000	117000	201000
Isonicotinic acid	Organic Acid And Its Derivatives	2870000	2810000	2820000	2500000	3220000	2530000	3040000	2900000	3630000	3500000	3620000	3760000	3320000	3420000	3210000	3430000	3810000	3320000	3130000	3360000	2990000	3310000	3610000	3350000	3460000	3950000	3500000	3430000	3500000	3500000	3560000	3680000	3370000	3640000	3230000	3460000	3450000	3350000	3400000	3400000	3140000	3500000	3620000	5230000	3800000	3770000	4090000	3760000
beta-Cubebene	Lipids_Fatty Acids	113000	102000	106000	108000	111000	97100	111000	102000	101000	93000	92100	104000	103000	103000	123000	110000	102000	114000	113000	116000	108000	107000	106000	115000	120000	111000	125000	116000	123000	97900	110000	113000	111000	93400	140000	120000	112000	114000	140000	104000	94500	84100	93100	82800	73900	93100	97200	86700
Furfural	Organic Acid And Its Derivatives	500000	526000	494000	448000	498000	484000	456000	612000	518000	481000	491000	478000	498000	526000	564000	486000	507000	562000	494000	578000	573000	582000	533000	502000	443000	465000	562000	625000	485000	613000	436000	602000	470000	436000	538000	546000	522000	519000	498000	458000	603000	538000	536000	428000	523000	565000	533000	561000
Methyl cinnamate	Benzene and substituted derivatives	200000	201000	218000	227000	211000	193000	206000	198000	203000	239000	189000	222000	192000	213000	210000	234000	208000	204000	203000	207000	214000	204000	214000	201000	208000	207000	214000	189000	204000	202000	221000	200000	217000	215000	202000	208000	216000	209000	214000	210000	189000	194000	193000	201000	181000	183000	183000	178000
Benzylcinnamate	Benzene and substituted derivatives	79700	78300	72900	72900	59200	59400	64000	55100	76900	64400	51500	72000	54200	49100	55500	49000	56600	63400	54100	88200	61900	52500	64600	65800	45500	49600	63500	55800	57000	49600	50300	61400	67500	72400	47500	63700	69400	66900	70400	64100	45400	52300	54700	47800	62700	56800	70500	48200
Ethyl dodecanoate	Fatty acyls	5230000	4350000	4980000	4070000	3920000	4250000	3850000	4060000	4530000	5140000	5010000	3940000	4280000	4140000	5000000	4170000	4110000	4070000	5020000	3710000	3920000	3940000	3670000	3840000	3880000	3550000	5120000	4020000	4070000	4440000	4260000	3970000	3990000	3910000	3960000	4100000	4610000	4010000	4070000	4660000	3770000	4120000	4330000	4060000	4170000	4600000	3860000	3660000
1,4-Xylene	Benzene and substituted derivatives	152000	166000	145000	143000	156000	151000	146000	157000	181000	142000	138000	142000	178000	162000	176000	159000	165000	157000	139000	147000	163000	187000	183000	134000	161000	176000	167000	174000	171000	185000	145000	158000	167000	152000	152000	161000	179000	201000	221000	161000	149000	149000	153000	162000	151000	136000	150000	139000
2,2,2-Trichloroethanol	Alcohol	6530000	7760000	7450000	5910000	7580000	7250000	7240000	6310000	7260000	6060000	6560000	7540000	7150000	6370000	7310000	6940000	7270000	6860000	6960000	7300000	7710000	6760000	6170000	6470000	6580000	6620000	6840000	6580000	8010000	6540000	6460000	7160000	7220000	6770000	7130000	8290000	7750000	7850000	7250000	6100000	6250000	6330000	5900000	5540000	5440000	6670000	6010000	5740000
Methylcysteine	Amino Acid metabolomics	64900	101000	109000	113000	82500	102000	106000	64700	79200	76100	72700	145000	109000	89700	85200	147000	145000	104000	106000	87400	125000	101000	105000	124000	104000	114000	79800	95300	205000	86300	118000	137000	96800	102000	77400	89800	97300	121000	144000	146000	98300	71200	180000	90900	113000	109000	117000	122000
2-Acetylfuran	Heterocyclic compound	17000000	15700000	19300000	15800000	18800000	18000000	16500000	18800000	18700000	15600000	17500000	15500000	15800000	17200000	18000000	18500000	19500000	18700000	16700000	19900000	20500000	19500000	20500000	19600000	18600000	17400000	18000000	18900000	19900000	17300000	17700000	20300000	17700000	17000000	20000000	17800000	19200000	19400000	18600000	18200000	20300000	21400000	19600000	18000000	19900000	17500000	21000000	20000000
Benzophenone	Benzene and substituted derivatives	172000	161000	168000	173000	154000	169000	174000	167000	167000	157000	152000	168000	150000	175000	165000	176000	178000	174000	172000	154000	168000	185000	173000	144000	151000	155000	163000	143000	152000	173000	178000	159000	183000	167000	180000	155000	156000	171000	161000	192000	152000	137000	152000	184000	175000	155000	163000	165000
Phenylacetaldehyde	Benzene and substituted derivatives	17800	184000	194000	48200	88300	16100	63300	18800	46800	11300	93400	217000	26500	106000	112000	509000	166000	83100	258000	207000	134000	73600	134000	180000	87300	151000	94000	172000	46700	195000	201000	122000	343000	178000	116000	379000	111000	211000	51000	155000	101000	35100	199000	137000	63400	164000	134000	197000
Methyl tetradecanoate	Fatty acyls	57700	60900	60200	59400	63300	54900	56900	63600	61200	59600	57000	58800	54300	55500	58900	53100	54000	61000	53900	51900	61300	56600	56800	57700	53000	53200	52800	49600	57300	59000	60200	48700	53500	55400	53900	52400	56900	57800	40900	47600	51100	62000	59400	53700	56000	50300	59300	54000
2,6-Di-tert-butyl-4-methylphenol	Benzene and substituted derivatives	631000	709000	424000	424000	390000	357000	355000	424000	445000	378000	351000	429000	394000	425000	420000	407000	412000	394000	434000	467000	398000	455000	408000	394000	474000	402000	406000	389000	329000	383000	478000	442000	410000	352000	406000	403000	426000	498000	386000	463000	375000	347000	369000	365000	452000	473000	307000	418000
2-Pentadecanone	Ketones	1290000	1340000	1420000	1380000	1480000	1390000	1440000	1440000	1510000	1390000	1370000	1450000	1450000	1340000	1360000	1350000	1430000	1440000	1370000	1440000	1340000	1380000	1380000	1380000	1320000	1390000	1390000	1310000	1300000	1360000	1360000	1290000	1390000	1350000	1410000	1440000	1360000	1350000	1320000	1360000	1360000	1380000	1350000	1360000	1370000	1310000	1360000	1430000
Methyl dihydrojasmonate	Organic Acid And Its Derivatives	2170000	2160000	2250000	2190000	2380000	2140000	2260000	2270000	2350000	2280000	2270000	2320000	2340000	2200000	2210000	2190000	2260000	2340000	2210000	2250000	2110000	2230000	2260000	2240000	2220000	2190000	2270000	2200000	2200000	2240000	2220000	2140000	2350000	2220000	2260000	2360000	2280000	2170000	2180000	2250000	2150000	2270000	2210000	2180000	2230000	2160000	2260000	2310000
Hexyl butyrate	Fatty acyls	48400	48700	55100	53900	52200	50100	49100	52900	51300	50400	49300	62600	63300	54400	54300	58300	62100	61200	63000	57500	58600	61300	54300	55700	64300	57000	58300	56100	59000	61000	53000	60700	53400	52700	59100	61200	57200	61200	56800	60300	42500	42300	43600	42200	41300	42200	44200	41000
3,5-Dinitrosalicylic acid	Organic Acid And Its Derivatives	1260000	1200000	1370000	1280000	1510000	1610000	1260000	1360000	1350000	1700000	1350000	1270000	1420000	1080000	1320000	1260000	1190000	1060000	1440000	1080000	1170000	1250000	1020000	1340000	1330000	1350000	1140000	1130000	1150000	1340000	1340000	1270000	1470000	1370000	1230000	1110000	1140000	1390000	1330000	1040000	1170000	1120000	1060000	1200000	1350000	1170000	1190000	1070000
o-Xylene	Benzene and substituted derivatives	143000	153000	132000	147000	141000	136000	138000	142000	152000	113000	140000	133000	166000	139000	168000	136000	138000	144000	116000	108000	137000	142000	156000	138000	182000	174000	156000	171000	159000	195000	158000	119000	125000	165000	144000	128000	154000	164000	189000	108000	112000	128000	146000	141000	150000	159000	122000	121000
1,3-diisopropylbenzene	Benzene and substituted derivatives	272000	236000	270000	268000	295000	256000	282000	264000	274000	259000	257000	276000	257000	272000	267000	306000	262000	274000	280000	277000	262000	275000	282000	302000	290000	266000	281000	252000	279000	274000	283000	271000	281000	277000	279000	289000	261000	299000	246000	295000	236000	247000	266000	262000	249000	252000	251000	253000
carene	Heterocyclic compound	246000	216000	231000	243000	215000	232000	241000	219000	226000	259000	226000	247000	221000	239000	244000	224000	252000	255000	243000	237000	237000	255000	225000	256000	232000	225000	247000	236000	247000	261000	234000	230000	215000	241000	240000	268000	259000	230000	248000	238000	208000	227000	237000	234000	235000	211000	217000	225000
Hexyl Acetate	Fatty acyls	22400	21500	44900	22700	34900	28800	25300	20600	28300	26600	33500	28300	24500	24100	29700	28900	29900	27500	26700	40800	25600	35900	36300	31000	32300	24700	32500	39500	32900	32800	25200	26700	35100	26100	36700	30000	40100	36400	34500	31200	31000	68300	39500	35100	70600	41400	38700	38600
DL-Leucine	Amino Acid metabolomics	350000	494000	500000	748000	668000	493000	755000	412000	500000	433000	524000	1260000	424000	614000	697000	755000	1020000	879000	889000	643000	889000	689000	407000	865000	431000	955000	431000	977000	2010000	608000	675000	891000	880000	960000	581000	854000	609000	1300000	808000	834000	574000	615000	1500000	500000	874000	799000	713000	747000
3-(Methylthio)-1-propanol	Alcohol	186000	163000	170000	180000	163000	167000	180000	166000	175000	161000	141000	153000	167000	181000	195000	156000	184000	182000	174000	164000	163000	160000	194000	142000	175000	206000	189000	173000	176000	213000	168000	160000	176000	163000	167000	167000	198000	197000	212000	177000	134000	163000	154000	151000	184000	166000	162000	163000
2-Undecanone	Ketones	252000	266000	239000	263000	256000	262000	253000	258000	232000	258000	276000	268000	276000	290000	309000	291000	267000	283000	327000	316000	307000	303000	279000	288000	303000	274000	286000	311000	302000	294000	316000	287000	294000	302000	267000	326000	315000	305000	310000	320000	274000	288000	302000	291000	302000	286000	296000	282000
Undecanal	Aldehyde	166000	158000	152000	167000	158000	171000	144000	155000	180000	176000	164000	179000	169000	194000	191000	179000	182000	175000	182000	184000	210000	188000	184000	177000	187000	177000	196000	194000	199000	226000	203000	212000	200000	188000	189000	199000	183000	196000	196000	211000	185000	184000	207000	177000	181000	188000	196000	188000
2-Pentyl-3-phenyl-2-propenal	Aldehyde	211000	226000	218000	218000	218000	225000	225000	220000	224000	241000	231000	223000	235000	233000	228000	218000	229000	240000	231000	213000	242000	233000	239000	233000	233000	245000	221000	232000	232000	260000	246000	244000	235000	235000	233000	247000	245000	238000	240000	237000	196000	217000	205000	203000	190000	204000	217000	201000
Pyrene	Benzene and substituted derivatives	194000	216000	208000	220000	210000	206000	212000	207000	213000	220000	207000	213000	218000	221000	210000	217000	217000	222000	217000	221000	230000	228000	211000	223000	214000	226000	229000	223000	230000	229000	241000	226000	227000	228000	228000	226000	229000	222000	235000	228000	192000	190000	198000	191000	182000	196000	208000	197000
2-(Methylthio)benzothiazole	Benzene and substituted derivatives	114000	103000	110000	115000	108000	101000	114000	104000	99100	101000	107000	113000	115000	112000	113000	151000	132000	120000	243000	212000	132000	129000	124000	115000	107000	136000	120000	122000	160000	125000	115000	120000	121000	112000	120000	113000	106000	123000	104000	114000	115000	135000	134000	112000	121000	121000	116000	124000
1-PENTADECANOL	Alcohol	1790000	1440000	1670000	1780000	1510000	1390000	2210000	1640000	1360000	1290000	1700000	1490000	1550000	1610000	1350000	1190000	1520000	1440000	1180000	1230000	1410000	1300000	1580000	1600000	1630000	1410000	1700000	1380000	1550000	1080000	1690000	1710000	1800000	1480000	1370000	1410000	1500000	1630000	1730000	1960000	1390000	1400000	1450000	1310000	1780000	1560000	1470000	1670000
Dibutyl phthalate	Benzene and substituted derivatives	13100000	16100000	13300000	12700000	14900000	14700000	13700000	15100000	13200000	13100000	13700000	14300000	13500000	13200000	14700000	14300000	13600000	15900000	13700000	13500000	15400000	12400000	15600000	16100000	15000000	14200000	13900000	14800000	15100000	15600000	14500000	13600000	16500000	14200000	16500000	16900000	14000000	14900000	15700000	13900000	11900000	11700000	13000000	12100000	11800000	12700000	13200000	12000000
Choline chloride	Others	343000	335000	287000	323000	336000	348000	505000	455000	322000	288000	332000	455000	426000	479000	336000	246000	362000	298000	311000	330000	398000	436000	336000	271000	400000	350000	414000	362000	465000	641000	498000	333000	315000	357000	396000	206000	344000	449000	437000	457000	279000	230000	281000	345000	367000	487000	380000	556000
caprate (10:0)	Lipids	120000	124000	124000	129000	113000	122000	121000	117000	132000	125000	125000	126000	140000	140000	147000	130000	130000	144000	143000	160000	142000	149000	146000	147000	136000	143000	152000	142000	142000	147000	138000	158000	148000	159000	150000	161000	166000	162000	157000	156000	160000	154000	145000	152000	176000	145000	167000	152000
Isobutyl decanoate	Fatty acyls	1940000	1930000	1910000	1790000	1900000	1820000	1920000	1820000	2010000	1780000	1900000	1940000	2590000	1880000	1780000	1870000	2510000	1880000	1960000	1870000	1920000	2370000	1840000	1820000	1850000	1800000	1900000	2330000	2260000	1810000	1870000	1860000	1990000	1880000	1690000	1770000	1850000	1830000	2340000	1760000	2380000	1810000	1820000	1780000	1890000	1790000	1790000	1860000
proline betaine	Organic Acid And Its Derivatives	201000	517000	263000	317000	165000	233000	352000	202000	199000	152000	312000	324000	256000	253000	371000	1120000	374000	302000	361000	408000	790000	956000	333000	475000	299000	547000	218000	693000	401000	400000	435000	203000	473000	219000	326000	309000	380000	405000	311000	497000	255000	288000	318000	462000	325000	357000	335000	252000
Bisphenol propane	Benzene and substituted derivatives	3280000	3210000	4450000	3170000	4510000	4730000	3390000	4610000	3400000	4330000	4370000	4270000	4470000	4570000	4150000	4150000	3110000	3230000	4520000	4660000	5040000	4270000	3320000	3210000	4260000	3040000	2990000	3050000	2950000	4340000	3160000	3080000	4550000	3250000	4000000	3180000	4130000	3250000	3200000	4130000	3060000	3100000	2930000	4190000	3160000	2790000	4070000	3360000
sphinganine	Lipids	4910000	4890000	5070000	5050000	4910000	4880000	4830000	4950000	4870000	4920000	4710000	4730000	4710000	4590000	4690000	4760000	4820000	4820000	4660000	4850000	4840000	4860000	4830000	4770000	4830000	4740000	4680000	4570000	4580000	4830000	4580000	4590000	4650000	4640000	4790000	4650000	4800000	4590000	4640000	4550000	4550000	4560000	4630000	4750000	4520000	4620000	4650000	4910000
3'-UMP	Nucleotide metabolomics	113000	128000	118000	116000	130000	129000	132000	128000	142000	136000	154000	147000	146000	153000	156000	153000	141000	168000	161000	165000	163000	157000	170000	175000	175000	166000	166000	164000	179000	184000	180000	173000	168000	182000	187000	172000	173000	187000	167000	181000	198000	203000	230000	232000	220000	221000	214000	253000
2'-Deoxycytidine 5'-Diphosphate	Nucleotide metabolomics	6330000	6520000	6990000	5630000	7430000	5980000	6050000	7170000	8440000	7440000	7530000	7580000	3340000	3670000	3200000	1980000	1950000	2130000	2740000	1920000	2240000	2200000	3090000	2300000	3230000	2290000	3280000	2240000	2470000	3380000	1860000	2130000	1800000	3830000	3730000	1850000	2390000	2490000	4450000	2020000	2180000	2200000	2240000	3230000	2120000	1580000	1700000	2000000
Lumichrome	Others	56500	56900	41400	43500	46400	45600	54400	45000	49700	41900	51500	46700	45700	46200	52300	58900	46200	51200	53700	51200	49600	57000	45500	49300	46300	44000	50500	56500	48100	58900	55300	53900	47900	53400	55000	60100	54800	62900	59600	63700	57700	64700	57100	60900	61300	61700	67000	64100
Oleate	Lipids	1730000	953000	1540000	724000	1730000	1450000	1370000	2730000	4220000	4170000	3650000	4250000	2560000	3690000	2670000	6870000	4580000	2870000	5050000	8450000	3980000	3470000	3270000	3000000	7800000	8950000	3490000	4370000	3950000	12000000	4980000	8010000	6530000	3640000	4100000	5360000	8710000	4190000	18900000	2120000	2430000	3000000	2680000	5870000	2060000	3770000	3680000	2170000
[truncated: 43 more columns]
