# Supplementary material for: Metabolomic analysis of exosomal-markers in esophageal squamous cell carcinoma
Source: Royal Society of Chemistry journal article supplement (doi:10.1039/d1nr04015d), 2021-01-01
Supplement: d1nr04015d4.xlsx [file d1nr04015d4.xlsx]

## Sheet: S-Table 3
Supplementary Table 3: The VIP values of the differential metabolites
Differential Metabolites	Class	VIP	p value
Terephthalic Acid	Benzene and substituted derivatives	2.52941	8.4775e-09
Taurochenodesoxycholic Acid	Bile Acids	1.34959	0.00180388
Glycocholic Acid	Bile Acids	1.59771	0.00122789
L-Gulonic-Γ-Lactone	Carbohydrate metabolomics	1.09757	0.0149497
Azelaic Acid	Organic Acid And Its Derivatives	1.67898	0.000286728
Subericacid	Organic Acid And Its Derivatives	1.05673	0.0212487
13-HOTrE [13S-hydroxy-9Z,11E,15Z-octadecatrienoic acid]	Oxidized lipid	1.65731	7.53559e-05
Palmitoleic Acid (C16:1)	Lipids_Fatty Acids	2.33102	2.42564e-07
Hexadecanoic Acid (C16:0)	Lipids_Fatty Acids	1.09925	0.0125972
Linoleic Acid (C18:2N6C)	Lipids_Fatty Acids	1.94595	2.00953e-06
Dodecanoic Acid(C12:0)	Lipids_Fatty Acids	1.12296	0.0475455
Elaidic Acid (C18:1N9T)	Lipids_Fatty Acids	1.13648	0.0130025
Cis-11,14,17-Eicosatrienoic Acid (C20:3)	Lipids_Fatty Acids	1.06931	0.0134527
Α-Linolenic Acid(C18:3N3)	Lipids_Fatty Acids	1.65634	0.000697004
Palmitaldehyde	Lipids_Fatty Acids	2.01341	0.000500877
8,15-Dihete	Lipids_Fatty Acids	1.33501	0.013676
Argininosuccinic acid	Organic Acid And Its Derivatives	1.04383	0.000745913
6β-hydroxytestosterone	Hormones	1.33632	0.000514659
N-Oleoyl Glycine	Organic Acid And Its Derivatives	1.0913	0.00362734
Hexadecanedioic acid	Lipids_Fatty Acids	1.789	3.30696e-05
Vanillylmandelic acid	Benzene and substituted derivatives	1.22045	0.00114997
Methylstearate	Fatty acyls	1.35065	0.00689516
Ethylsalicylate	Organic Acid And Its Derivatives	2.24242	9.74371e-07
1-Naphthol	Phenols And Its Derivatives	1.1053	0.0259153
Methyl hexadecanoate	Fatty acyls	2.17473	1.00723e-07
4-tert-Octylphenol	Phenols And Its Derivatives	1.14664	0.0181093
PHENYL-BETA-D-GLUCOPYRANOSIDE	Carbohydrate metabolomics	1.17622	0.0103211
2-(Methylthio)ethanol	Alcohol	1.47084	0.0103536
9-oxoODE [9-oxo-10E,12Z-octadecadienoic acid]	Oxidized lipid	1.66248	0.000720796
Mono-Methyl Glutarate	Organic Acid And Its Derivatives	1.24399	0.00101985
Betaine	Alkaloid	1.15906	0.0328702
Phe-Phe	Amino Acid metabolomics	1.19115	0.0159165
Adenosine	Nucleotide metabolomics	1.23111	0.00953655
Purine	Nucleotide metabolomics	1.7211	0.000525431
Pantothenol	CoOthersEnzyme Factor & vitamin	1.10209	0.016448
7-Methyluric Acid	Organic Acid And Its Derivatives	1.44921	0.00256608
Lysopc 18:2	LipidsOthersPhospholipid	1.48369	0.00945324
Taurocholic Acid Sodium Salt Hydrate	Organic Acid And Its Derivatives	1.55359	0.000404795
Pantetheine	CoOthersEnzyme Factor & vitamin	2.27371	1.00736e-08
L-Pipecolic Acid	Amino Acid metabolomics	1.22779	0.0270627
Phosphoric Acid	Organic Acid And Its Derivatives	1.10884	0.0146406
Punicic Acid	Lipids_Fatty Acids	1.82398	2.25662e-05
Indole	Indole And Its Derivatives	2.16058	8.81537e-07
N-Acetyl-L-alanine	Organic Acid And Its Derivatives	1.20385	0.0288267
15-deoxy-δ-12,14-PGJ2	Lipids_Fatty Acids	1.51153	0.000771416
alpha-Cadinene	Lipids_Fatty Acids	1.18713	0.00814021
Stearidonic Acid	Lipids_Fatty Acids	1.46443	0.000375984
N-Acetylphenylalanine	Organic Acid And Its Derivatives	1.50317	0.000502263
Cuminaldehyde	Lipids_Fatty Acids	1.14997	0.0189622
Furfural	Organic Acid And Its Derivatives	1.06763	0.00598905
Methyl cinnamate	Benzene and substituted derivatives	1.69731	6.50212e-05
1,4-Xylene	Benzene and substituted derivatives	1.39209	0.00130511
2,2,2-Trichloroethanol	Alcohol	1.41463	0.00163102
2-Acetylfuran	Heterocyclic compound	1.87862	2.70674e-06
2-Pentadecanone	Ketones	1.75957	6.12311e-05
Methyl dihydrojasmonate	Organic Acid And Its Derivatives	1.03284	0.0226926
Hexyl butyrate	Fatty acyls	1.04753	0.0257039
1,3-diisopropylbenzene	Benzene and substituted derivatives	1.70743	0.000313103
carene	Heterocyclic compound	1.11964	0.0246682
Undecanal	Aldehyde	1.16893	0.0239629
Dibutyl phthalate	Benzene and substituted derivatives	1.77988	1.4014e-05
Choline chloride	Others	1.72898	0.00149683
caprate (10:0)	Lipids	1.76786	1.52921e-05
Isobutyl decanoate	Fatty acyls	1.68773	0.000894087
proline betaine	Organic Acid And Its Derivatives	1.26247	0.0180039
3'-UMP	Nucleotide metabolomics	2.42145	6.4217e-08
2'-Deoxycytidine 5'-Diphosphate	Nucleotide metabolomics	1.19166	0.0184559
Lumichrome	Others	1.2631	0.00408651
